## **Megakaryocyte derived immune-stimulating cells regulate host-defense immunity against bacterial pathogens**

Jin Wang<sup>1\*</sup>, Jiayi Xie<sup>2,3\*</sup>, Daosong Wang<sup>3\*</sup>, Xue Han<sup>2,3\*</sup>, Minqi Chen<sup>3</sup>, Guojun Shi<sup>1</sup>, Linjia Jiang<sup>2#</sup>, Meng Zhao<sup>2,3,4#</sup>

<sup>1</sup>Department of Endocrinology & Metabolism, The Third Affiliated Hospital, Sun Yat-sen University, Guangzhou, Guangdong, 510630, China

<sup>2</sup>RNA Biomedical Institute, Sun Yat-sen Memorial Hospital, Sun Yat-sen University, Guangzhou, Guangdong, 510120, China

<sup>3</sup>Key Laboratory of Stem Cells and Tissue Engineering, Zhongshan School of Medicine, Sun Yat-sen University, Ministry of Education, Guangzhou, Guangdong, 510080, China

<sup>4</sup>Lead Contact

\* These authors contributed equally to this work.

#Correspondence: Meng Zhao E-mail: [zhaom38@mail.sysu.edu.cn](mailto:zhaom38@mail.sysu.edu.cn);

Linjia Jiang: E-mail: [jjianglj7@mail.sysu.edu.cn](mailto:jjianglj7@mail.sysu.edu.cn)

1 **Abstract**

2 Megakaryocytes (MKs) continuously produce platelets to support hemostasis and form a  
3 niche for hematopoietic stem cell maintenance in the bone marrow. MKs are also involved  
4 in inflammation responses; however, the mechanism remains poorly understood. Here,  
5 using single-cell sequencing we identified an MK-derived immune-stimulating cell (MDIC)  
6 population exhibiting both MK-specific and immune characteristics, which highly  
7 expresses CXCR4 and immune response genes to participate in host-protective response  
8 against bacteria. MDICs interact with myeloid cells to promote their migration and  
9 stimulate the bacterial phagocytosis of macrophages and neutrophils by producing TNF $\alpha$   
10 and IL-6. CXCR4<sup>high</sup> MDICs egress circulation and infiltrate into the spleen, liver, and lung  
11 upon bacterial infection. Ablation of MKs suppresses the innate immune response and T  
12 cell activation to impair the anti-bacterial effects in mice under the *Listeria monocytogenes*  
13 challenge. Using hematopoietic stem/progenitor cell lineage-tracing mouse line, we show  
14 that MDICs are generated from infection-induced emergency megakaryopoiesis in  
15 response to bacterial infection. Overall, we identify MDICs as an MK subpopulation,  
16 which regulates host-defense immune response against bacterial infection.

17

18 **Introduction**

19 Megakaryocytes (MKs) are large and rare hematopoietic cells in the bone marrow, which  
20 continually produce platelets to support hemostasis and thrombosis (Deutsch and Tomer,  
21 2006). MK progenitors undergo multiple rounds of endomitosis during maturation to  
22 achieve polyploid (Chang et al., 2007; Deutsch and Tomer, 2013; Machlus and Italiano,  
23 2013; Nagata et al., 1997; Patel et al., 2005). MKs and their progenitors also migrate

1 between distinct microenvironments and organs for their proliferation, maturation, and  
2 biological functions (Avecilla et al., 2004; Fuentes et al., 2010; Lefrancais et al., 2017; Pal  
3 et al., 2020; Tamura et al., 2016; Wang et al., 1998). Although platelet generation is the  
4 prominent role of MKs, emerging evidence suggests that MKs have other biological  
5 functions. Mature MKs physically interact with HSCs and constitute a unique niche to HSC  
6 quiescence in the bone marrow (Bruns et al., 2014; Zhao et al., 2014). MKs also interact  
7 with other niche cells, such as osteoblasts (Dominici et al., 2009; Olson et al., 2013), non-  
8 myelinating Schwann cells (Jiang et al., 2018; Yamazaki et al., 2011), and blood vessels  
9 (Avecilla et al., 2004; Sacma et al., 2019) to further influence the attraction and retention  
10 of hematopoietic stem and progenitor cells during homeostasis and stress.

11 MK biased hematopoietic stem cells (HSCs) induce emergency megakaryopoiesis to  
12 actively generate MKs upon acute inflammation, which can efficiently replenish the loss  
13 of platelets during inflammatory insult (Haas et al., 2015). Studies suggested that MKs  
14 might participate in immune responses independent of their platelet generation role (Cunin  
15 and Nigrovic, 2019). MKs express multiple immune receptors, such as IgG Fc receptors  
16 and toll-like receptors (TLRs), enabling them to sense inflammation directly (Cunin and  
17 Nigrovic, 2019). Mature MKs also express major histocompatibility complex (MHC) to  
18 activate antigen-specific CD8<sup>+</sup> T cells and enhance CD4<sup>+</sup> T cells and Th17 cell responses  
19 through stimulating antigen processing (Finkielstein et al., 2015; Pariser et al., 2021;  
20 Zufferey et al., 2017). Furthermore, MKs release multiple cytokines and chemokines to  
21 influence immune cells. For example, MKs produce IL-1 $\alpha$  and IL-1 $\beta$  to promote arthritis  
22 susceptibility in mice resistant to arthritis (Cunin et al., 2017) and produce CXCL1 and  
23 CXCL2 to promote neutrophil efflux from the bone marrow (Köhler et al., 2011). Lung

1 MKs contribute to thrombosis (Lefrancais et al., 2017) and, more interestingly, participate  
2 in immune responses (Pariser et al., 2021), although the relationship between lung MKs  
3 and bone marrow circulating MKs (Nishimura et al., 2015) remains unexplored.  
4 Furthermore, the recent single-cell atlas shows that MKs are heterogeneous and contain  
5 subpopulations that express multiple immune genes and are involved in inflammation  
6 response (Liu et al., 2021; Pariser et al., 2021; Sun et al., 2021; Yeung et al., 2020).  
7 However, the mechanisms that MK subpopulations regulate immune cells against bacterial  
8 pathogens remain poorly understood.

9 Here, by combining scRNA-seq with functional assays, we identified an MK-derived  
10 immune-stimulating cell (MDIC) population, which was generated by infection-induced  
11 emergency megakaryopoiesis, and stimulated innate immunity against bacterial infection.

12

## 13 **Results**

### 14 **Single-cell atlas identifies an immune-modulatory subpopulation of MKs**

15 We applied droplet-based scRNA-seq with CD41<sup>+</sup> forward scatter (FSC)<sup>high</sup> bone marrow  
16 MKs to explore the MK heterogeneity (Figure 1A; Figure 1-figure supplement 1A, B). To  
17 enrich accurate MKs, we further performed transcriptomic profile analysis in the  
18 phenotypically enriched MKs (Yeung et al., 2020). Our scRNA-seq successfully detected  
19 5368 high-quality cells (Figure 1-figure supplement 1B, C), in which one MK cluster (1712  
20 cells) and six immune cell clusters (3656 cells) were annotated according to their gene  
21 profile (Figure 1-figure supplement 1D-G) and alignment with published scRNA-seq  
22 immune cell data (Almanzar et al., 2020; Hamey et al., 2021; Pariser et al., 2021; Xie et  
23 al., 2020; Yeung et al., 2020). Our annotated MKs shared a similar gene profile with

1 reported MKs but had a distinct gene profile with immune cells, including myeloid  
2 progenitors, basophils, neutrophils, monocytes, dendritic cells, macrophages, B cells, and  
3 T cells, in an integrated scRNA-seq analysis platform (Figure 1-figure supplement 2).  
4 Therefore, we re-clustered the transcriptionally enriched 1712 MKs into five  
5 subpopulations, termed MK1 to MK5 (Figure 1B; Figure 1-figure supplement 3A, B),  
6 which were further confirmed by the integrated scRNA-seq analysis platform to rule out  
7 the potential immune cell contamination (Pariser et al., 2021; Xie et al., 2020; Yeung et al.,  
8 2020) (Figure 1-figure supplement 3C, D). However, we noticed that mature MKs with  
9 huge sizes were captured at a relatively low rate, potentially due to the limitation in current  
10 techniques in cell purification and single-cell preparation (Liu et al., 2021; Sun et al., 2021).

11 Enriched signature genes in Gene Ontology exhibited that MK1 and MK2 highly  
12 expressed nuclear division, DNA replication and repair genes for endomitosis (Figure 1C,  
13 D). MK3 enriched blood coagulation and thrombosis genes for platelet generation (Figure  
14 1C, D). No signature pathways were enriched in MK4. MK5 enriched cell migration and  
15 immune response genes (Figure 1C, D; Figure 1-figure supplement 4A-E), cytokine,  
16 chemokine (Figure 1E, F; Figure 1-figure supplement 4F), and genes involved in immune  
17 cell interaction (Figure 1G, Figure 1-figure supplement 5A). MK5 also expressed signature  
18 genes in recently reported inflammatory-related MKs (*Cd53*, *Lsp1*, *Anxa1*, *Spi*) (Sun et al.,  
19 2021) and immune MKs (*Ccl3*, *Cd52*, *Selplg*, *Sell*, *Adam8*) (Liu et al., 2021) (Figure 1-  
20 figure supplement 5B). We also noticed that MK5 highly expressed *Cxcr4* than other MK  
21 subpopulations (Figure 1H, I), although most MKs express CXCR4 (Hamada et al., 1998)  
22 (Figure 1-figure supplement 6A). To confirm this, we found that CXCR4<sup>high</sup> MKs  
23 expressed MK markers (Figure 1-figure supplement 6B), and were mainly polyploid cells

1 (Figure 1-figure supplement 6C) and had platelet generation ability (Figure 1-figure  
2 supplement 6D), although they have relatively low polyploidy (Figure 1-figure supplement  
3 6E) and smaller cell size (Figure 1-figure supplement 6F-H). Overall, using scRNA-seq,  
4 we identified a cell type (MK5) exhibiting both MK-specific and immune characteristics,  
5 which might take part in immune responses.

6

### 7 **MDICs enhance myeloid cell mobility and bacterial phagocytosis**

8 As MK5 enriched genes involved in myeloid cell activation (Figure 1-figure supplement  
9 4E) and myeloid cell interactions (Figure 1G, Figure 1-figure supplement 5A), we further  
10 explored the role of MK5 in regulating myeloid immune cells. To investigate the role of  
11 MKs in regulating the innate immunity function of myeloid cells against pathogens, we  
12 challenged mice with *Listeria (L.) monocytogenes*, a Gram-positive facultative  
13 intracellular bacterium (Bishop and Hinrichs, 1987; Edelson and Unanue, 2000), which  
14 induce myelopoiesis (Eash et al., 2009) (Figure 2-figure supplement 1A, B). Interestingly,  
15 we noticed that more myeloid cells were associated with CXCR4<sup>high</sup> MKs than with  
16 CXCR4<sup>low</sup> MKs in the bone marrow of mice three days after *L. monocytogenes* infection  
17 (Figure 2A, B), a dramatic rise compared to randomly placed myeloid cells to MKs (Figure  
18 2B). In supporting this, the myeloid cell-CXCR4<sup>high</sup> MK association (mean distance 15.36  
19  $\mu\text{m}$ ) was significantly closer than the myeloid cell-CXCR4<sup>low</sup> MKs association (Figure 2C;  
20 mean distance 25.62  $\mu\text{m}$ ,  $p = 7.0 \times 10^{-4}$  by KS test) in the bone marrow of mice three days  
21 after *L. monocytogenes* infection. Furthermore, the observed mean distance of myeloid  
22 cells to CXCR4<sup>high</sup> MKs (15.36  $\mu\text{m}$ ) is significantly closer than the randomly placed  
23 myeloid cells to CXCR4<sup>high</sup> MKs [35.37  $\mu\text{m}$ ,  $p (\mu < 15.36) = 1.8 \times 10^{-10}$ ], whereas the

1 observed mean distance of myeloid cells to CXCR4<sup>low</sup> MKs (25.62  $\mu$ m) is not different  
2 from random simulations [27.76  $\mu$ m,  $p$  ( $\mu < 25.62$ ) = 0.14] (Figure 2C). We also noticed that  
3 bone marrow myeloid cells were preferably adjacent to the CXCR4<sup>high</sup> MK-blood vessel  
4 intersection in mice three days after *L. monocytogenes* infection (Figure 2-figure  
5 supplement 1C, D). These observations indicated that CXCR4<sup>high</sup> MKs might regulate  
6 myeloid cells upon bacterial infection.

7 To explore how CXCR4<sup>high</sup> MKs regulate myeloid cells, we interestingly found that  
8 CXCR4<sup>high</sup> MKs more effectively promoted myeloid cell mobilization than CXCR4<sup>low</sup>  
9 MKs in our transwell assays (Figure 2D). Furthermore, we asked whether CXCR4<sup>high</sup> MKs  
10 regulate myeloid cell function against pathogens. To this aim, we incubated purified  
11 CXCR4<sup>low</sup> MKs and CXCR4<sup>high</sup> MKs with neutrophils or macrophages for bacterial  
12 phagocytosis analysis. We found that CXCR4<sup>high</sup> MKs more efficiently enhanced the  
13 bacterial phagocytosis of neutrophils and macrophages than CXCR4<sup>low</sup> MKs (Figure 2E-  
14 H). Overall, our data show that CXCR4<sup>high</sup> might be a potential marker to identify a  
15 functional immune-modulating MK subpopulation. We, therefore, referred CXCR4<sup>high</sup>  
16 MKs as MK-derived immune-stimulating cells (MDICs).

17 Our scRNA-seq also exhibited that the high expression of *Cxcr4* was positively  
18 correlated with immune cell-stimulating cytokines, such as *Ccl6*, *Tnf*, and *Il6* (Li et al.,  
19 2018; Rothe et al., 1993; Shapouri-Moghaddam et al., 2018) in MKs (Figure 2I). In line  
20 with this, CXCR4<sup>high</sup> MKs had higher TNF $\alpha$  and IL-6 protein levels than CXCR4<sup>low</sup> MKs  
21 (Figure 2J, K; Figure 2-figure supplement 2). The TNF $\alpha$  and IL-6 levels in CXCR4<sup>high</sup> MKs  
22 were comparable to macrophages from mice three days after *L. monocytogenes* infection  
23 (Figure 2-figure supplement 2B) which are known as the primary cellular source of TNF $\alpha$

1 and IL-6 upon infection (Shapouri-Moghaddam et al., 2018). These observations suggested  
2 that MDICs might stimulate myeloid cell phagocytosis by producing TNF $\alpha$  and IL-6.  
3 Indeed, anti-TNF $\alpha$  and anti-IL-6 blocking antibodies significantly compromised the role  
4 of MDICs in stimulating bacterial phagocytosis of neutrophils and macrophages (Figure  
5 2L, M).

6

### 7 **MKs stimulate both innate and adaptive immunity against bacterial pathogens**

8 To explore the *in vivo* role of MKs upon *L. monocytogenes* infection in mice, we employed  
9 *Pf4-cre; iDTR* mice, in which MKs were rendered sensitive to diphtheria toxin (DT) (Zhao  
10 et al., 2014) (Figure 3A, B). Notably, MK ablation dramatically increased the bacterial  
11 burdens in the liver and spleen three days after *L. monocytogenes* infection (Figure 3C).  
12 We also found that MK ablation reduced the number of myeloid cells, including monocytes,  
13 macrophages, dendritic cells (DCs), and neutrophils, in the liver and spleen (Figure 3D, E),  
14 suggesting the role of MKs in promoting myeloid cells against pathogens. We further  
15 investigated how MKs regulate adaptive immunity against pathogen infection. To this  
16 aim, we challenged *Pf4-cre; iDTR* mice with ovalbumin (OVA)-expressing recombinant  
17 microbe (*L. monocytogenes*-OVA). Seven days after *L. monocytogenes*-OVA infection,  
18 splenocytes from control or MK ablated mice were re-stimulated with OVA peptide *in vitro*  
19 to assess OVA-specific T cell activation (Figure 3F). Notably, MK ablation dramatically  
20 reduced the number of CD4<sup>+</sup> IFN $\gamma$ <sup>+</sup> Th1, CD4<sup>+</sup> IL4<sup>+</sup> Th2, and CD8<sup>+</sup> cytotoxic T  
21 lymphocytes but did not impact the total number of CD4<sup>+</sup> T cells and CD8<sup>+</sup> T cells (Figure  
22 3G). These observations demonstrated that MKs regulate innate and adaptive immunity  
23 against *L. monocytogenes* infection. To explore whether MDICs contribute to the immune



1 response against bacterial pathogens, we infused the purified MDICs (CXCR4<sup>high</sup> MKs)  
2 and CXCR4<sup>low</sup> MKs into MK ablation mice during *L. monocytogenes* infection. Notably,  
3 we found that the infusion with MDICs but not with CXCR4<sup>low</sup> MKs partially rescued the  
4 bacterial clearance defect in MK ablation mice (Figure 3H, I).

5

### 6 **Bacterial infection stimulates MDIC migration**

7 High *Cxcr4* expression indicated that MDICs might migrate between bone marrow  
8 microenvironment and circulation in response to infection (Suraneni et al., 2018). In line  
9 with this, our spatial distribution analysis showed that ~80% of MKs directly contacted  
10 blood vessels three days after *L. monocytogenes* infection, which was much higher than in  
11 control mice (~40%) (Figure 4A, B; Figure 4-figure supplement 1A). Furthermore, more  
12 CXCR4<sup>high</sup> MKs, with small cell sizes (Figure 1-figure supplement 6F-H), were more  
13 tightly associated with blood vessels and trapped in the sinusoid than CXCR4<sup>low</sup> MKs three  
14 days after *L. monocytogenes* infection (Figure 4C, D). However, *L. monocytogenes*  
15 infection did not impact the association between MKs and HSCs (Figure 4A, E), albeit the  
16 critical role of perivascular MKs in maintaining HSC quiescence (Bruns et al., 2014; Itkin  
17 et al., 2016; Zhao et al., 2014) and the dramatic HSC activation upon infection (Figure 4-  
18 figure supplement 1B).

19 To further explore the dynamic migration of MKs upon pathogen infection, we  
20 developed a live imaging method to trace MK migration in the bone marrow (seen in the  
21 method). Using *Pf4-cre; tdTomato* mice and *in vivo* live imaging approach, we observed  
22 that small tdTomato<sup>+</sup> MKs rapidly migrated into sinusoids without rupture or platelet  
23 release upon infection (Figure 4F, Figure 4-video 1). In contrast, MKs with large sizes

1 showed much slower migration (Figure 4-video 1). Additionally, MDICs decreased in the  
2 bone marrow three days after *L. monocytogenes* infection but with a similar proliferation  
3 and apoptosis rate compared to CXCR4<sup>low</sup> MKs (Figure 4G, Figure 4-figure supplement  
4 1C-F), indicating MDICs might migrate out of bone marrow. Consistent with this, the  
5 frequency of MK5, which enriched MDICs, decreased in bone marrow after *L.*  
6 *monocytogenes* infection in our single-cell atlas (Figure 4-figure supplement 2).  
7 Furthermore, we found that *L. monocytogenes* infection decreased the expression of  
8 CXCL12, the ligand of CXCR4 (Sugiyama et al., 2006), in bone marrow but increased  
9 CXCL12 expression in the lung, liver, and spleen (Figure 4-figure supplement 3),  
10 indicating that MDICs might migrate from bone marrow to other tissues. In line with this,  
11 MDICs increased in the peripheral blood and organs, including the liver, spleen, and lung  
12 three days after *L. monocytogenes* infection without an alternation of cell cycle and  
13 apoptosis, whereas CXCR4<sup>low</sup> MKs did not differ except for a slight increase in the liver  
14 (Figure 4G; Figure 4-figure supplement 4).

15 To further explore how MKs migrate in organs during bacterial infection *in vivo*, we  
16 employed *Pf4-cre; Rosa26-cell membrane-localized tdTomato cell membrane-localized*  
17 *EGFP (R26R<sup>mT/mG</sup>)* mice in which cell membrane-localized EGFP (mGFP) expresses  
18 exclusively in MK lineage (Tiedt et al., 2007). We found that mGFP<sup>+</sup> MKs increased  
19 dramatically in the liver (10.4-fold increased) and spleen (2.33-fold increased) three days  
20 after *L. monocytogenes* infection (Figure 4H, I). To further confirm the tissue infiltration  
21 of MKs upon infection, we intravenously injected membrane-localized tdTomato  
22 (mtdTomato) expressing bone marrow cells from *R26R<sup>mT/mG</sup>* mice into control recipients  
23 or recipients infected with *L. monocytogenes* one day before mtdTomato<sup>+</sup> cell perfusion

1 (Figure 4J). We found that two days after  $\text{mtdTomato}^+$  cell perfusion, engrafted  
2  $\text{mtdTomato}^+$   $\text{CXCR4}^{\text{high}}$  MDICs more efficiently infiltrated into the liver (92.1%) and  
3 spleen (92.5%); by contrast,  $\text{mtdTomato}^+$   $\text{CXCR4}^{\text{low}}$  MKs (66.7%) migrated to the bone  
4 marrow (Figure 4K).

5 As the lung is an important site for platelet generation (Lefrancais et al., 2017), we  
6 aligned our MK sc-RNAseq data with lung MKs (Pariser et al., 2021; Yeung et al., 2020),  
7 and found that MK5, MK4, and MK3 showed similar gene profiles with lung MKs (Figure  
8 4L). Moreover, MK5 enriched more inflammatory pathway genes, antigen processing, and  
9 presentation pathway after *L. monocytogenes* infection, which enabled MK5 to achieve a  
10 more similar transcriptional profile as the lung MKs than control MK5 (Figure 4-figure  
11 supplement 5). Interestingly, we found that engrafted  $\text{tdTomato}^+$  MKs (from *Pf4-cre*;  
12 *tdTomato* mice) more efficiently infiltrated the lungs in the infected recipients than in the  
13 control recipients (Figure 4M, N).

14

## 15 **Acute inflammation induced emergency megakaryopoiesis generates MDICs upon** 16 **infection**

17 Infection-induced emergency megakaryopoiesis compensates the platelet consumption  
18 (Verschoor et al., 2011). Consistently, we observed that MKs were ruptured in the bone  
19 marrow three days after *L. monocytogenes* infection to recover the reduced platelets post-  
20 *L. monocytogenes* infection (Couldwell and Machlus, 2019; Nishimura et al., 2015) (Figure  
21 5A-C). However, MDICs were increased at 18 hours after *L. monocytogenes* infection and  
22 substantially declined at 72 hours in bone marrow, whereas  $\text{CXCR4}^{\text{low}}$  MKs remained  
23 unchanged upon infection (Figure 5D). As MK-committed HSCs drive infection-induced

1 emergency megakaryopoiesis (Haas et al., 2015), we asked whether emergency  
2 megakaryopoiesis also generates MDICs to participate in the host-defense response. To  
3 this aim, we employed *Scl-creER*; *tdTomato* mice (Göthert et al., 2005) to monitor the  
4 HSPC derived emergency megakaryopoiesis upon bacterial infection. Eighteen hours after  
5 tamoxifen recombining tdTomato in HSPCs and *L. monocytogenes* infection (Figure 5E),  
6 we observed that tdTomato<sup>+</sup> HSPCs derived tdTomato<sup>+</sup> CXCR4<sup>high</sup> MDICs rapidly  
7 increased in the bone marrow, similar to the platelet-generating MKs (tdTomato<sup>+</sup>  
8 CXCR4<sup>low</sup> MKs) (Figure 5F), without a noticeable rise of hematopoietic progenitors  
9 (Figure 5G). Overall, our observations indicated that MDICs might be generated by  
10 emergency megakaryopoiesis to stimulate pathogen defense.

11

## 12 **Discussion**

13 MKs express multiple immune receptors, which participate in megakaryocyte maturation,  
14 platelet activation, and potentially influence neutrophils and the adaptive immune cells  
15 (Cunin and Nigrovic, 2019). Accordingly, MKs prevent the spread of dengue virus  
16 infection by enhancing the type 1 interferons pathway in murine and clinical biospecimens  
17 (Campbell et al., 2019) and contribute to cytokine storms in severe COVID-19 patients  
18 (Bernardes et al., 2020; Ren et al., 2021; Stephenson et al., 2021). Recent scRNA-seq  
19 studies suggested the existence of MK subpopulations for inflammation responses (Liu et  
20 al., 2021; Pariser et al., 2021; Sun et al., 2021; Wang et al., 2021); however, the mechanism  
21 that MKs regulate immune response remains elusive. Here, we identified that MK5 has  
22 both MK and immune cell characteristics, producing platelets and enriching immune  
23 response genes. We also demonstrated the role of this cell type, a CXCR4<sup>high</sup> MK

1 subpopulation (MDICs) in recruiting and stimulating innate myeloid cells by producing  
2 TNF $\alpha$  and IL-6, for bacterial phagocytosis.

3 Normal HSC to MK development takes 11-12 days in humans and 4 days in mice;  
4 However, emergency megakaryopoiesis takes less than a day to generate MKs upon  
5 inflammation stress (Couldwell and Machlus, 2019; Liu et al., 2021; Sun et al., 2021)  
6 (Figure 5D). Previously, researchers believed that the emergency megakaryopoiesis mainly  
7 contributes to the replenishment of damaged platelets upon acute inflammation (Haas et  
8 al., 2015). Here, for the first time, we found that emergency megakaryopoiesis also quickly  
9 generated MDICs to facilitate immune responses against bacterial infection.

10 A recent report showed that the lung is a reservoir of MKs for platelet production  
11 (Lefrancais et al., 2017). Other works also indicate that lung MKs share a similar  
12 transcriptional profile with lung DCs and participate in pathogen infection (Boilard and  
13 Machlus, 2021; Pariser et al., 2021). However, the correspondence between MKs in the  
14 lung and bone marrow remains unexplored. Neonatal lung MKs lack the immune  
15 molecules in adult lung MKs (Pariser et al., 2021), which indicated that lung MKs might  
16 have distinct developmental origins. Similarly, MKs are observed to egress and migrate to  
17 the pulmonary capillary under stresses (Davis et al., 1997). Our works suggested that lung  
18 MKs might migrate from bone marrow upon infection challenges, although more detailed  
19 investigations are warranted in future studies.

20

## 21 **Materials and Methods**

### 22 **Key resources table**

| <b>Reagent type</b> | <b>Designation</b>                   | <b>Source</b> | <b>Identifier</b> | <b>Additional information</b> |
|---------------------|--------------------------------------|---------------|-------------------|-------------------------------|
| Antibody            | Mouse:anti CD41a(MWReg30)            | eBioscience   | Cat#17-0411-82    | RRID:AB_1603237               |
| Antibody            | Mouse:anti CXCR4(2B11)               | eBioscience   | Cat#53-9991-80    | RRID:AB_953573                |
| Antibody            | Mouse:anti CD11b(M1/70)              | eBioscience   | Cat#12-0112-82    | RRID:AB_2734869               |
| Antibody            | Mouse:anti F4/80(BM8)                | eBioscience   | Cat#17-4801-80    | RRID:AB_2784647               |
| Antibody            | Mouse:anti Gr-1(RB6-8C5)             | Biolegend     | Cat#108424        | RRID:AB_2137485               |
| Antibody            | Mouse:anti Ly-6C(HK1.4)              | Biolegend     | Cat#128022        | RRID:AB_10639728              |
| Antibody            | Mouse:anti CD11c(N418)               | eBioscience   | Cat#12-0114-82    | RRID:AB_465552                |
| Antibody            | Mouse:anti CD45.1(A20)               | eBioscience   | Cat#15-0453-82    | RRID:AB_468759                |
| Antibody            | Mouse:anti CD45.2(104)               | Biolegend     | Cat#109831        | RRID:AB_10900256              |
| Antibody            | Mouse:anti CD4(GK1.5)                | eBioscience   | Cat#12-0041-82    | RRID:AB_465506                |
| Antibody            | Mouse:anti CD8a(53-6.7)              | Biolegend     | Cat#100707        | RRID:AB_312746                |
| Antibody            | Mouse:anti IFN- $\gamma$ (XMG1.2)    | Biolegend     | Cat#505813        | RRID:AB_493312                |
| Antibody            | Mouse:anti IL-4(11B11)               | Biolegend     | Cat#504118        | RRID:AB_10898116              |
| Antibody            | Mouse:anti CD34(RAM34)               | eBioscience   | Cat#11-0341-82    | RRID:AB_465021                |
| Antibody            | Mouse:anti Sca-1(D7)                 | Biolegend     | Cat#108114        | RRID:AB_493596                |
| Antibody            | Mouse:anti c-Kit(2B8)                | Biolegend     | Cat#105812        | RRID:AB_313221                |
| Antibody            | Mouse:anti CD135(A2F10)              | Biolegend     | Cat#135314        | RRID:AB_2562339               |
| Antibody            | Mouse:anti CD3 $\epsilon$ (145-2C11) | Biolegend     | Cat#100310        | RRID:AB_312675                |

|                         |                                                       |                 |                 |                  |
|-------------------------|-------------------------------------------------------|-----------------|-----------------|------------------|
| Antibody                | Mouse:anti B220(RA3-6B2)                              | Biolegend       | Cat#103210      | RRID:AB_312995   |
| Antibody                | Mouse:anti TER-119(TER-119)                           | Biolegend       | Cat#116210      | RRID:AB_313711   |
| Antibody                | Mouse:anti IgM(II/41)                                 | eBioscience     | Cat#15-5790-82  | RRID:AB_494222   |
| Antibody                | Mouse:anti CD16/32(93)                                | Biolegend       | Cat#101333      | RRID:AB_2563692  |
| Antibody                | Mouse:anti CD127(A7R34)                               | Biolegend       | Cat#135021      | RRID:AB_1937274  |
| Antibody                | Mouse:anti TNF $\alpha$ (MP6-XT22)                    | Invitrogen      | Cat#17-7321-81  | RRID:AB_469507   |
| Antibody                | Mouse:anti IL-6(MP5-20F3)                             | Biolegend       | Cat#504507      | RRID:AB_10694868 |
| Antibody                | Mouse:anti BrdU(BU20A)                                | eBioscience     | Cat#11-5071-42  | RRID:AB_11042627 |
| Antibody                | Mouse:anti Endomucin                                  | R&D             | Cat#AF4666      |                  |
| Antibody                | Mouse:anti CD150(TC15-12F12.2)                        | Biolegend       | Cat#115908      | RRID:AB_345278   |
| Antibodies              | Mouse:anti Lineage Panel                              | Biolegend       | Cat#133307      | RRID:AB_11124348 |
| Antibody                | Donkey anti-Goat AF488                                | Invitrogen      | Cat#A32814      | RRID:AB_2762838  |
| Antibody                | Anti-TNF-alpha Antibody                               | Sino Biological | Cat#50349-R023  |                  |
| Antibody                | Donkey anti-Rabbit AF488                              | Invitrogen      | Cat#R37118      | RRID:AB_2556546  |
| Chemical compound, drug | Diphtheria toxin (DT)                                 | Sigma-Aldrich   | Cat#D0564-1MG   |                  |
| Chemical compound, drug | BrdU (5-Bromo-2'-Deoxyuridine)                        | Sigma-Aldrich   | Cat#B5002-250mg |                  |
| Chemical compound, drug | CFSE (5-Carboxyfluorescein, Succinimidyl Ester)       | Invitrogen      | Cat#C2210       |                  |
| Chemical compound, drug | DAPI (4',6-Diamidino-2-Phenylindole, Dihydrochloride) | Thermo Fisher   | Cat#D1306       |                  |

|                                         |                                                        |                          |                           |                 |
|-----------------------------------------|--------------------------------------------------------|--------------------------|---------------------------|-----------------|
| Commercial kit                          | Chromium Single Cell 3' GEM, Library & Gel Bead Kit v3 | 10x Genomics             | PN-1000075                |                 |
| Commercial kit                          | Chromium Chip B Single Cell Kit                        | 10x Genomics             | PN-1000074                |                 |
| Cell line (Mus musculus)                | NCTC clone 929                                         | ATCC                     | CCL-1                     | RRID: CVCL_0462 |
| Deposited data                          | scRNA sequencing data (raw and processed data)         | This paper               | GEO: GSE168224            |                 |
| Genetic reagent (Mus musculus)          | C57BL/6J                                               | Shanghai Model Organisms | NA                        |                 |
| Genetic reagent (Mus musculus)          | Tg(Pf4-icre)Q3Rsko/J (Pf4-cre)                         | Jackson Laboratory       | Stock No: 008535          |                 |
| Genetic reagent (Mus musculus)          | Gt(ROSA)26Sortm1(HBEGF)Awai/J (iDTR)                   | Jackson Laboratory       | Stock No: 007900          |                 |
| Genetic reagent (Mus musculus)          | Gt(ROSA)26Sortm4(ACTB-tdTomato,-EGFP)Luo/J (mTmG)      | Jackson Laboratory       | Stock No: 007576          |                 |
| Genetic reagent (Mus musculus)          | Gt(ROSA)26Sortm9(CAG-tdTomato)Hze/J (tdTomato)         | Jackson Laboratory       | Stock No: 007905          |                 |
| Genetic reagent (Mus musculus)          | Scl-CreER mice                                         | J. R. Göthert            | Göthert et al., 2005      |                 |
| Strain, strain background (L. monocyto) | 10403S                                                 | Bishop and Hinrichs      | Bishop and Hinrichs, 1987 |                 |



|                     |                        |                                                                                                     |                 |                  |
|---------------------|------------------------|-----------------------------------------------------------------------------------------------------|-----------------|------------------|
| genes)              |                        |                                                                                                     |                 |                  |
| Software, algorithm | Cell ranger_3.0.2      | 10x Genomics                                                                                        | tenx            | RRID: SCR_01695  |
| Software, algorithm | R_3.6.3                | CRAN (R_3.6.3)                                                                                      | NA              |                  |
| Software, algorithm | Seurat_3.0.2           | CRAN (R_3.6.3)                                                                                      | Seurat          | RRID: SCR_016341 |
| Software, algorithm | ggplot2_3.2.0          | CRAN (R_3.6.3)                                                                                      | ggplot2         | RRID:SCR_014601  |
| Software, algorithm | clusterProfiler_3.12.0 | Bioconductor                                                                                        | clusterProfiler | RRID: SCR_016884 |
| Software, algorithm | pheatmap_1.0.12        | CRAN (R_3.6.3)                                                                                      | pheatmap        | RRID:SCR_016418  |
| Software, algorithm | CellPhoneDB_2.1.7      | <a href="https://github.com/Teichlab/cellphonedb">https://github.com/Teichlab/cellphonedb</a>       | CellPhoneDB     | RRID:SCR_017054  |
| Software, algorithm | CellChat_1.1.3         | <a href="https://github.com/sqjin/CellChat">https://github.com/sqjin/CellChat</a>                   | CellChat        |                  |
| Software, algorithm | symphony_1.0           | <a href="https://github.com/immunogenomics/symphony">https://github.com/immunogenomics/symphony</a> | symphony        |                  |
| Software, algorithm | MetaNeighbor_1.10.0    | <a href="https://github.com/maggiacrow/MetaNeighbor">https://github.com/maggiacrow/MetaNeighbor</a> | MetaNeighbor    | RRID:SCR_016727  |
| Software, algorithm | iMAP_1.0.0             | <a href="https://github.com/Svvoird/iMAP">https://github.com/Svvoird/iMAP</a>                       | iMAP            |                  |
| Software, algorithm | scmap_1.16.0           | Bioconductor                                                                                        | Scmap           | RRID:SCR_017338  |
| Software, algorithm | enrichplot_1.4.0       | Bioconductor                                                                                        | enrichplot      |                  |
| Software, algorithm | Imaris_8.4             | Bitplane                                                                                            | Imaris          | RRID:SCR_007370  |
| Software, algorithm | FlowJo_10              | BD Bioscience                                                                                       | FlowJo          | RRID:SCR_008520  |

|                     |                              |                               |             |                 |
|---------------------|------------------------------|-------------------------------|-------------|-----------------|
| Software, algorithm | ImageJ_ 1.8.0                | National Institutes of Health | ImageJ      | RRID:SCR_003070 |
| Other               | Corn oil                     | Sigma-Aldrich                 | Cat#PHR2897 |                 |
| Other               | Lymphocyte Separation Medium | TBD Science                   | Cat#LTS1077 |                 |

1

## 2 **Mice**

3 C57BL/6-Tg(*Pf4-cre*)Q3Rsko/J (*Pf4-cre*), C57BL/6-Gt(ROSA) 26Sortm1(HBEGF)  
4 *Awai*/J (*iDTR*), C57BL/6-Gt(ROSA)26Sortm4(ACTB-tdTomato,-EGFP)Luo/J (*mTmG*),  
5 Gt(ROSA)26Sortm9(CAG-tdTomato)Hze (*tdTomato*) mice were obtained from the  
6 Jackson Laboratory. *Scl-creER* mice were provided by J. R. Göthert. All mice were  
7 maintained in the C57BL/6 background. Animals were blindly included in the experiments  
8 according to genotyping results as a mix of male and female. All animal experiments were  
9 performed according to protocols approved by the Sun Yat-sen University animal care and  
10 use committee.

## 11 **Bacteria and infections**

12 *Listeria (L.) monocytogenes* infection was performed as described with minor  
13 modifications (Edelson and Unanue, 2000; Verschoor et al., 2011). In brief, wild type *L.*  
14 *monocytogenes* strain 10403S grown to exponential phase at 37 °C in TSB media was  
15 injected intravenously at a dose of 2 500 colony-forming units (CFUs) to determine spleen  
16 and liver bacterial burdens three days after infection. Recombinant *L. monocytogenes*  
17 expressing the chicken ovalbumin peptide (OVA<sub>257-264</sub>) (*L.m.* – OVA<sub>257-264</sub>) was injected  
18 intravenously at a dose of 2500 CFUs to determine activated spleen T cells seven days after  
19 infection. *Escherichia (E.) coli* wild type strain 85344 expressing GFP was constructed as

1 previously described (Feng et al., 2020). GFP labeled *E. coli* was grown to exponential  
2 phase at 37 °C in LB media and washed with PBS before being suspended for phagocytosis  
3 assays.

#### 4 **Antibodies for flow cytometry analysis and cell sorting**

5 For cell sorting and analysis, monoclonal antibodies to CD41 (MWReg30, eBioscience),  
6 CXCR4 (2B11, eBioscience), CD11b (M1/70, eBioscience), F4/80 (BM8, eBioscience),  
7 Gr-1 (RB6-8C5, Biolegend), Ly6C (HK1.4, Biolegend), CD11c (N418, eBioscience),  
8 CD45.1 (A20, eBioscience), CD45.2 (104, Biolegend), CD4 (GK1.5, eBioscience), CD8  
9 (53-6.7, Biolegend), INF- $\gamma$  (XMG1.2, Biolegend), IL4 (11B11, Biolegend), CD34  
10 (RAM34, eBioscience), Sca-1 (D7, Biolegend), c-kit (2B8, Biolegend), CD135 (A2F10,  
11 Biolegend), CD3 $\epsilon$  (145-2C11, Biolegend), CD45R (RA3-6B2, Biolegend), TER-119 (Ter-  
12 119, Biolegend), IgM (II/41, eBioscience), F $\gamma$ RII (93, Biolegend), IL-7R (A7R34,  
13 Biolegend), TNF $\alpha$  (MP6-XT22, Invitrogen) and IL-6 (MP5-20F3, Biolegend) were used  
14 where indicated.

#### 15 **Flow cytometry and cell sorting**

16 Bone marrow cells were isolated from mouse femora and tibiae as previously reported  
17 (Jiang et al., 2018). Splenocytes were mechanically dissociated in PBS with 2% FBS.  
18 Peripheral blood was collected from the retro-orbital sinus and anticoagulated by K2-  
19 EDTA. Those three kinds of cells then underwent red blood cell lysis for 5 min using 0.16  
20 M ammonium chloride solution. Liver cells were mechanically dissociated and lysed using  
21 0.16 M ammonium chloride solution, followed by gradient sedimentation using a density  
22 reagent (LTS1077, TBD Science) following the manufacturer's instruction. Cell sorting  
23 was performed using a cell sorter (MoFlo Astrios, Beckman Coulter) with a 100  $\mu$ m nozzle

1 at a speed of around 5000 cells/sec. Cell analysis was performed on either one of the flow  
2 cytometers (Attune NxT, Thermo Fisher; Cytex AURORA, Aurora).

### 3 **Single-cell library construction and sequencing**

4 Sorted CD41<sup>+</sup> FSC<sup>high</sup> single cells from four mice of a control MK group and an MK group  
5 from mice three days upon *L. monocytogenes* infection each were processed through the  
6 Chromium Single Cell Platform using the Chromium Single Cell 3' Library and Gel Bead  
7 Kit v3 (PN-1000075, 10x Genomics) and the Chromium Single Cell B Chip Kit (PN-  
8 1000074, 10x Genomics) as the manufacturer's protocol. In brief, over 7000 cells were  
9 loaded onto the Chromium instrument to generate single-cell barcoded droplets. Cells were  
10 lysed and barcoded reverse transcription of RNA occurred. The library was prepared by  
11 following amplification, fragmentation, adaptor, and index attachment then sequenced on  
12 an Illumina NovaSeq platform.

### 13 **scRNA-seq processing**

14 The scRNA-seq reads were aligned to the mm10 reference genomes, and unique molecular  
15 identifier (UMI) counts were obtained by Cell Ranger 3.0.2. Normalization, dimensionality  
16 reduction, and clustering were performed with the Seurat 3.0 R package (Butler et al.,  
17 2018). For the control and *Listeria (L.) monocytogenes* infection group, we loaded one 10x  
18 Genomics well each and detected 5663 and 5948 cells that passed the Cell Ranger pipeline,  
19 respectively. To ruled out low quality cells, cells with >12% mitochondrial content or <200  
20 detected genes were excluded with Seurat function subset (percent.mt<12 &  
21 nFeature\_RNA>200). We ruled out doublets with default parameters of DoubletDecon R  
22 package, and 54 control cells and 939 *L. monocytogenes* infected cells were excluded.  
23 Following the standard procedure in Seurat's pipeline, we identified 3272 MKs from

1 control mice (1712 MKs) and mice with *L. monocytogenes* infection (1560 MKs) (3897  
2 and 3449 immune cells were discarded respectively) in combination with MetaNeighbor  
3 method. Preprocessed dataset normalization was performed by dividing the UMI counts  
4 per gene by the total UMI counts in the corresponding cell and log-transforming before  
5 scaling and centering. SCT normalization was performed with the script: `object <-`  
6 `SCTransform(object, vars.to.regress = "percent.mt", verbose = FALSE)`. Signature genes  
7 of each cluster were obtained using the Seurat function `FindMarkers` with Wilcox test with  
8 fold change  $> 1.5$  and  $p$  value  $< 0.05$  after clustering. Heatmaps, individual UMAP plots,  
9 and violin plots were generated by the Seurat functions in conjunction with `ggplot2` and  
10 `pheatmap` R packages.

11 Similarities and UMAP projection between our scRNA-seq data and published datasets  
12 GSE152574 (Yeung et al., 2020), GSE158358 (Pariser et al., 2021), GSE137540 (Xie et  
13 al., 2020), GSE128074 (Hamey et al., 2021), or GSE132042 (Almanzar et al., 2020) were  
14 conducted by MetaNeighbor R package (Crow et al., 2018), `iMAP.py` and `Symphony` R  
15 package (Kang et al., 2021). `iMAP` integration was performed using the default parameters  
16 except `n_top_genes=2000`, `min_genes=0`, `min_cells=0`, and `n_epochs=100` before doing  
17 dimensionality reduction using Uniform Manifold Approximation and Projection method  
18 (UMAP, `n_neighbors=30`, `n_pca=30`). Radar charts were generated with JavaScript written  
19 by Nadieh Bremer (VisualCinnamon.com). Euclidean distances denote the distances  
20 between the centroid of each cluster.

21 Correlations were calculated based on normalized RNA values, with the function `cor`  
22 and the parameter `method= "spearman"`. Multiple testing correction using the function  
23 `cor.test` with the parameter `method= "spearman"` and it was applied for *Cxcr4* expression

1 correlations. We calculated the similarities between MK1 to 5 with the published MK,  
2 immune cell, and myeloid progenitor datasets (Almanzar et al., 2020; Hamey et al., 2021;  
3 Pariser et al., 2021; Xie et al., 2020; Yeung et al., 2020) using scmap R package (Kiselev  
4 et al., 2018). Default parameters and 1 000 features were used and threshold  $> 0$  was set.  
5 Cell-type matches are selected based on the highest value of similarities and the second-  
6 highest value which is not 0.01 less than the highest value across all reference cell types.

7 Cytokine, inflammatory, chemokine, and antigen processing and presentation scores  
8 were evaluated with the AddModuleScore function of Seurat using genes from KEGG  
9 pathway ko04060, cytokine-cytokine receptor interaction; GO:0006954, inflammatory  
10 response; chemokine ligands from CellPhoneDB.mouse (Jin et al., 2021) and GO:0019882,  
11 antigen processing and presentation.

12 Interaction analysis of MKs and immune cells were conducted by CellPhoneDB  
13 (Efremova et al., 2020) (transformed to human orthologous genes (Davidson et al., 2020))  
14 and CellChat R package (Jin et al., 2021). Only interactions involving cytokines were  
15 shown. Gene Ontology (GO) analysis was performed using clusterProfiler R package (Yu  
16 et al., 2012) and visualized using enrichplot R package (Yu, 2019).

17 Gene set enrichment analysis (GSEA) was performed using gsea R package  
18 (Subramanian et al., 2005) and visualized using enrichplot R package. Gene lists were pre-  
19 ranked by the fold change values of the differential expression analysis using Seurat  
20 function FindMarkers. Gene sets for GSEA were obtained from GO database (GO:0002367,  
21 cytokine production involved in immune response; GO:0006954, inflammatory response;  
22 GO:0008009, chemokine activity; GO:0022409, positive regulation of cell-cell adhesion;  
23 GO:0002275, myeloid cell activation involved in immune response).

1 Gene set variation analysis (GSVA) was performed using GSVA R package  
2 (Hanzelmann et al., 2013). GSVA was performed to calculate GSVA score of indicated  
3 pathway genes in single cell datasets with the whole protein encoding genes after log  
4 normalization of expression values. Gene sets for GSVA were obtained from GO database  
5 (GO:0022409, positive regulation of cell-cell adhesion; GO:0002275, myeloid cell  
6 activation involved in immune response; GO:0002367, cytokine production involved in  
7 immune response; GO:0007596, blood coagulation; GO:0019882, antigen processing and  
8 presentation; GO:0034340: response to type I interferon; GO:0034341: response to  
9 interferon-gamma; GO:0045088, regulation of innate immune response; GO:0042742,  
10 defense response to bacterium; GO:0002819, regulation of adaptive immune response;  
11 GO:1903708, positive regulation of hemopoiesis).

## 12 **Lung cells preparation for flow cytometry**

13 Lungs were removed and digested as described with minor modifications (Lefrancais et al.,  
14 2017). In brief, removed lungs were placed in 1.5 ml tubes, minced with scissors, and  
15 digested with 1 ml digestion buffer (HBSS with 1mg/ml collagenase D, 0.1 mg/ml DNase  
16 I, 25 mM HEPES, 2 mM L-glutamine, and 2% FBS) for 30 min at 37°C before filtration  
17 through a 100- $\mu$ m cell strainer and red blood cell lysis for 5 min. Samples were then filtered  
18 through 70- $\mu$ m strainers and resuspended for subsequent surface marker staining for flow  
19 cytometry.

## 20 **Megakaryocyte ablation induction**

21 *Pf4-cre* mice were mated with the *iDTR* line to generate *Pf4-cre; iDTR* mice. Diphtheria  
22 toxin (DT, Sigma-Aldrich) was injected intraperitoneally every day at a dose of 40 ng g<sup>-1</sup>  
23 bodyweight into *Pf4-cre*<sup>+</sup>; *iDTR*<sup>+/-</sup> mice and their cre negative counterparts to induce

1 megakaryocyte ablation as indicated.

## 2 **Cre-ER recombinase induction**

3 *Scl-creER* mice were mated with the *tdTomato* line to generate *Scl-creER; tdTomato* mice.

4 For induction of cre-ER recombinase, *Scl-creER, tdTomato*<sup>+/-</sup> mice were injected with  
5 tamoxifen intraperitoneally once (2 mg in 0.1 ml corn oil; Sigma-Aldrich).

## 6 **BrdU incorporation assay**

7 5-bromo-2-deoxyuridine (BrdU) was administered at a single dose of 125 mg kg<sup>-1</sup> body  
8 mass by intraperitoneal injection. Whole bone marrow cells were collected 12 hours later  
9 and incubated with anti-CD41 and anti-CXCR4 for one hour. Cells were washed and then  
10 fixed with 4% PFA at 4 °C overnight. Cells were then permeabilized with 0.5% TritonX-  
11 100 for 15 minutes at room temperature and incubated with 1mg ml<sup>-1</sup> DNase I (Roche) for  
12 one hour at 37 °C followed by incubating with anti-BrdU (BU20A, eBioscience) for one  
13 hour at room temperature before being analyzed.

## 14 **Annexin V binding assay**

15 For Annexin V binding assay, bone marrow cells were incubated with cell surface markers  
16 for one hour at 4 °C and then washed with PBS before being resuspended with Annexin V  
17 binding buffer (Biolegend). Cells were then incubated with FITC Annexin V (Biolegend)  
18 for 15 minutes at room temperature in dark, and then 300 µl Annexin V binding buffer was  
19 added to each tube. Cells were analyzed by a flow cytometer.

## 20 **Immunostaining**

21 Immunostaining of frozen sections was performed as described (Jiang et al., 2018). For  
22 bone sections, mice were perfused with PBS and 4% paraformaldehyde (PFA). Then the  
23 bones were fixed with 4% PFA for 24 hours, decalcified with 0.5 M EDTA for 2 days, and



1 gradient dehydrated by 15% and 30% sucrose for another 2 days. The thick of sections was  
2 30  $\mu\text{m}$ . We used CD41 (MWReg30; eBioscience; 1:200), Endomucin (R&D; 1:100),  
3 CD150 (TC15-12F12.2; Biolegend; 1:100), CD48 (HM48-1; Biolegend; 1:100), CXCR4  
4 (2B11, eBioscience; 1:100) antibodies, and lineage panel (Biolegend; cat #133307; 1:50).  
5 Secondary staining was done with donkey anti-goat AlexaFluor 488 (Invitrogen; 1:1000).  
6 For the liver and spleen from *Pf4-cre<sup>+</sup>; mT/mG<sup>+/-</sup>* mice, and lung from *Pf4-cre<sup>+</sup>;*  
7 *tdTomato<sup>+/-</sup>* mice, we used DAPI (Thermo Fisher; 0.5  $\mu\text{g ml}^{-1}$ ) to stain the frozen sections.  
8 For phagocytosis analysis, F4/80 (BM8, eBioscience; 1:100), CD11b (M1/70; Invitrogen;  
9 1:100), CD41 (MWReg30; Thermo Fisher; 1:200) and DAPI was used. For sorted MKs,  
10 we used CXCR4 (2B11, eBioscience; 1:100), TNF $\alpha$  (R023, Sino Biological; 1:100) and  
11 IL-6 (MP5-20F3, Biolegend; 1:100) antibody. Secondary staining was performed with  
12 donkey anti-rabbit AlexaFluor 488 (Invitrogen; 1:1000). Confocal images were obtained  
13 using a spinning-disk confocal microscope (Dragonfly, Andor) and analyzed using Imaris  
14 9.0 software (Oxford Instruments). Three-Dimension plots were generated using  
15 Matplotlib (Hunter, 2007).

## 16 **Quantitative real-time (qRT-) PCR**

17 For RT-qPCR, MKs were dissociated in Trizol (Magen), and RNA was extracted following  
18 the manufacture's instruction. RNA was reverse transcribed into cDNA using the  
19 TransCript All-in-One First-Strand cDNA Synthesis kit (Transgene). Quantitative PCR was  
20 performed using a Bio-Rad CFX 96 touch. The primers for *Pf4* were 5'-  
21 GGGATCCATCTTAAGCACATCAC-3' (forward) and 5'-  
22 CCATTCTTCAGGGTGGCTATG-3' (reverse). The primers for *Vwf* were 5'-  
23 CTTCTGTACGCCTCAGCTATG-3' (forward) and 5'-

1 GCCGTTGTAATTCCCACACAAG-3' (reverse). The primers for *Mpl* were 5'-  
2 AACCCGGTATGTGTGCCAG-3' (forward) and 5'-AGTTCATGCCTCAGGAAGTCA-3'  
3 (reverse). The primers for *Cxcl12* were 5'-AGGTTCTTATTTACGGCTTGT-3' (forward)  
4 and 5'-TGGGTGCTGAGACCTTTGAT-3' (reverse). The primers for *Gapdh* were 5'-  
5 AGGTCGGTGTGAACGGATTTG-3' (forward) and 5'-GGGGTCGTTGATGGCAACA-  
6 3' (reverse). *Gapdh* was used as the reference gene for qRT-PCR analysis.

### 7 **Transwell migration**

8 Transmigration assays were performed on a transwell with a pore size of 5  $\mu\text{m}$  (Biofil).  
9 CXCR4<sup>low</sup> MKs or CXCR4<sup>high</sup> MKs from bone marrow were sorted (5000 cells per well)  
10 from control mice and added to the lower chamber with 600  $\mu\text{l}$  IMDM (Thermo Fisher)  
11 plus 10% FBS (Gibco). Peripheral blood cells were collected as described in the “Flow  
12 cytometry and cell sorting” section.  $6 \times 10^5$  peripheral blood cells were resuspended in 100  
13  $\mu\text{l}$  RPMI 1640 (Gibco) plus 10% FBS and added to the upper insert to continue for two-  
14 hour incubation at 37 °C, 5% CO<sub>2</sub>. Cells in the lower chamber were harvested, washed  
15 with PBS once, and resuspended with 100  $\mu\text{l}$  PBS for staining and FACS counting.

### 16 **Phagocytosis**

17 Bone marrow-derived macrophages (BMDM) from C57BL/6 mice at 6-8 weeks of age  
18 were differentiated from bone marrow precursors with minor modifications (Minutti et al.,  
19 2019). In brief, bone marrow cells were isolated and propagated for seven days in DMEM  
20 without sodium pyruvate or HEPES (Gibco), containing 20% FBS (Gibco), 30%  
21 supernatants of L929 conditioned media, and 1% Pen/Strep (Hyclone) at 37 °C.  
22 Macrophage phagocytosis assays were performed on a transwell plate with a pore size of  
23 5  $\mu\text{m}$  (Biofil) as described with modifications (Sharif et al., 2014). Briefly, attached cells

1 were replated into 24-well plates,  $5 \times 10^4$  cells per well, on glass coverslips for 24-hour  
2 culture. Then 5 000 sorted CXCR4<sup>low</sup> MKs or CXCR4<sup>high</sup> MKs were added in the upper  
3 inserts and placed onto macrophages chambers for additional 16 hours incubation without  
4 or with  $2 \mu\text{g ml}^{-1}$  TNF $\alpha$  neutralizing antibody (R023, Sino Biological; 1:100) or  $2 \mu\text{g ml}^{-1}$   
5 IL-6 neutralizing antibody (MP5-20F3, Biolegend) at 37 °C, 5% CO<sub>2</sub>. The upper inserts  
6 were discarded and macrophages were washed with PBS without antibiotics and incubated  
7 with  $10^5$  GFP-labeled *E. coli* for two hours at 37 °C, 5% CO<sub>2</sub>. Cells were washed three  
8 times with PBS and incubated with DMEM without sodium pyruvate or HEPES (Gibco)  
9 with gentamycin ( $50 \mu\text{g ml}^{-1}$ ) for 30 minutes at 37 °C, 5% CO<sub>2</sub> to remove adherent bacteria.  
10 Cells were then fixed by cold methanol for 15 minutes and blocked with 10% BSA  
11 overnight, followed by incubation with F4/80 (BM8, eBioscience; 1:100) for two hours at  
12 room temperature before being quantified using a spinning disk confocal microscope  
13 (Dragonfly, Andor).

14 For neutrophil phagocytosis, CD11b<sup>+</sup> Gr1<sup>+</sup> Ly6c<sup>-</sup> neutrophils were sorted from the spleen  
15 and propagated in RPMI 1640 (Gibco) containing 10% FBS. Neutrophil phagocytosis was  
16 performed as described in macrophage phagocytosis assay, except cells were sedimented  
17 for 30 minutes and fixed on glass coverslips after incubated with GFP-*E. coli* and  
18 gentamycin. The capacity of phagocytosis was evaluated by fluorescence intensity of GFP-  
19 *E. coli*. within macrophages and neutrophils.

## 20 **Bone marrow live imaging**

21 *Pf4-cre*<sup>+</sup>; *tdTomato*<sup>+/-</sup> mice were infected with *L. monocytogenes* for 24 hours. FITC-  
22 Dextran (average mol wt 2000000, Sigma-Aldrich) was injected intravenously at a dose of  
23 1.25 mg per mouse before being sacrificed. Bone marrow was flushed integrally and fixed

1 onto a glass slide in a chamber, rinsed with RPMI 1640 (Gibco), and covered slightly with  
2 a coverslip. Confocal images were obtained every minute on the spinning-disk confocal  
3 microscope (Dragonfly, Andor) and analyzed using Imaris 9.0 software (Oxford  
4 Instruments).

#### 5 ***In vitro* MK culture, MK size, and proplatelet formation measurement**

6 MKs were sorted using a cell sorter (MoFlo Astrios, Beckman Coulter) and cultured in 24-  
7 well plates in SFEM (Stem Cell Technologies) plus 100 ng ml<sup>-1</sup> mTPO (Novoprotein) and  
8 1% Pen/Strep (Hyclone), and incubated at 37 °C, 5% CO<sub>2</sub> for four days. Images were taken  
9 by a Nikon Ts2R microscope equipped with a Nikon DS-Ri2 camera. Cell size and  
10 proplatelet formation were measured on day three or day five post-cultured, respectively,  
11 using Nikon NIS-Elements BR.

#### 12 **Bone marrow transfer experiments**

13 *Pf4-cre* mice were mated with the *tdTomato* line to generate *Pf4-cre*<sup>+</sup>; *tdTomato*<sup>+/-</sup> mice.  
14 *tdTomato*<sup>+</sup> MKs were isolated from *Pf4-cre*<sup>+</sup>; *tdTomato*<sup>+/-</sup> mice. 6-8-week-old recipient  
15 mice were pre-treated with PBS or 2500 CFUs of *L. monocytogenes* as previously  
16 described one day before cell perfusion. 1 × 10<sup>5</sup> *tdTomato*<sup>+</sup> MKs were sorted and  
17 intravenously injected into control or *L. monocytogenes* infected mice. *tdTomato*<sup>+</sup> MKs  
18 were detected in lungs with immunostaining two days after cell perfusion.

19 *mtdTomato*<sup>+</sup> bone marrow cells were isolated from *Pf4-cre*<sup>-</sup>; *mTmG*<sup>+/-</sup> mice. 1 × 10<sup>6</sup>  
20 *mtdTomato*<sup>+</sup> bone marrow cells were intravenously injected into control or one-day-*L.*  
21 *monocytogenes* infected mice. *mtdTomato*<sup>+</sup> MKs were detected in bone marrow, liver, and  
22 spleen two days after cell perfusion.

23 For *in vivo* CXCR4<sup>high</sup> MK function assay in MK ablation mice, DT was

1 intraperitoneally injected every day for five days. On the second and fourth days,  $2 \times 10^5$   
2 sorted wild type CXCR4<sup>high</sup> MKs or CXCR4<sup>low</sup> MKs were intravenously injected into  
3 indicated groups. PBS or 2500 CFUs of *L. monocytogenes* as previously described were  
4 injected intravenously on the third day. Spleen and liver were harvested three days after  
5 infection to determine the bacterial burdens as described.

### 6 **T cell reactivation *in vitro***

7 Splenocytes ( $1 \times 10^6$  cells well<sup>-1</sup>) from control or MK ablated mice after seven days *L.m.*-  
8 OVA infection were re-stimulated for four hours *in vitro* with OVA peptide (10  $\mu$ M) in the  
9 presence of Brefeldin-A (BFA, 10  $\mu$ g ml<sup>-1</sup>). Activated T cells were then analyzed by a flow  
10 cytometer.

### 11 **Computational modeling of random myeloid cell localization**

12 We have performed randomized simulations as in previous reports (Bruns et al., 2014;  
13 Jiang et al., 2018) in Python. Images of a 400  $\mu$ m  $\times$  400  $\mu$ m bone marrow region with  
14 CXCR4<sup>high</sup> and CXCR4<sup>low</sup> MKs, in which background staining was removed, were used to  
15 generate MKs onto which 200 myeloid cells were randomly placed, consistent with an  
16 average density of 200 myeloid cells per field. Each simulated run placed 200 random  
17 myeloid cells (mean diameter 5  $\mu$ m) was repeated 500 times. The shortest Euclidean  
18 distance was calculated for each myeloid cell to CXCR4<sup>high</sup> or CXCR4<sup>low</sup> MKs. Random  
19 and observed distance distributions were compared using the modified nonparametric two-  
20 dimensional (2D) KS test as described (Bruns et al., 2014; Jiang et al., 2018).

### 21 **Statistical analyses**

22 Data are presented as means  $\pm$  s.e.m except for phagocytosis assays and MK size  
23 measurement, which are presented as means  $\pm$  first and third quartiles. For phagocytosis

1 assay and MK size measurement, data were analyzed by a one-dimensional KS test.  
2 Differences were considered statistically significant if  $p < 0.05$ . For the comparison of  
3 three-dimensional distances, a two-dimensional KS test was used. The difference was  
4 considered statistically significant if  $p < 0.05$ . For multiple comparisons analysis, data were  
5 analyzed by repeated-measures one-way analysis of variance (ANOVA) followed by  
6 Dunnett's test. Differences were considered statistically significant if  $p < 0.05$ . †  $P < 0.05$ , #  
7  $P < 0.01$ , ##  $P < 0.001$ , n.s., not significant. For other experiments except for scRNA-seq  
8 analysis, data were analyzed by a two-tailed Student's  $t$ -test. Differences were considered  
9 statistically significant if  $p < 0.05$ . \*  $p < 0.05$ , \*\*  $p < 0.01$ , \*\*\*  $p < 0.001$ , n.s., not  
10 significant.

#### 11 **Data availability**

12 The scRNA-seq data generated in this study are deposited in GEO (GSE168224,  
13 <https://www.ncbi.nlm.nih.gov/geo/query/acc.cgi?acc=GSE168224>). The code used in the  
14 study can be accessed at GitHub ([https://github.com/JYCathyXie/MK\\_infection](https://github.com/JYCathyXie/MK_infection)).

#### 16 **Acknowledgements**

17 We thank the National Key Research and Development Program of China  
18 (2017YFA0103403, 2018YFA0107200), NSFC (81822001, 81900101, 81800164), The  
19 Key Research and Development Program of Guangdong Province (2019B020234002),  
20 Shenzhen Foundation of Science and Technology (JCYJ20170818103626421), China  
21 Postdoctoral Science Foundation (2021M693614), Guangdong Innovative and  
22 Entrepreneurial Research Team Program (2016ZT06S029, 2019ZT08Y485), Sanming  
23 Project of Medicine in Shenzhen (No.SZSM201911004) for generous support.

1

## 2 **Author contributions**

3 J.W., J.X., D.W., X.H. designed and performed most of the experiments, analyzed the data,  
4 and generated figures. D.W. contributed to histology and live imaging. M.C. contributed to  
5 MK ablation experiments. L.J. and G.S. contributed to scientific discussion and manuscript  
6 preparation. M.Z. supervised the project and wrote the manuscript.

7

## 8 **Competing interests**

9 The authors declare no competing interests.

10

## 11 **References**

- 12 Almanzar, N., Antony, J., Baghel, A.S., Bakerman, I., Bansal, I., Barres, B.A., Beachy,  
13 P.A., Berdnik, D., Bilen, B., Brownfield, D., *et al.* (2020). A single-cell transcriptomic  
14 atlas characterizes ageing tissues in the mouse. *Nature* 583, 590-595.
- 15 Avecilla, S.T., Hattori, K., Heissig, B., Tejada, R., Liao, F., Shido, K., Jin, D.K., Dias, S.,  
16 Zhang, F., Hartman, T.E., *et al.* (2004). Chemokine-mediated interaction of hematopoietic  
17 progenitors with the bone marrow vascular niche is required for thrombopoiesis. *Nature*  
18 *medicine* 10, 64-71.
- 19 Bernardes, J.P., Mishra, N., Tran, F., Bahmer, T., Best, L., Blase, J.I., Bordoni, D.,  
20 Franzenburg, J., Geisen, U., Josephs-Spaulding, J., *et al.* (2020). Longitudinal Multi-  
21 omics Analyses Identify Responses of Megakaryocytes, Erythroid Cells, and  
22 Plasmablasts as Hallmarks of Severe COVID-19. *Immunity* 53, 1296-1314.e1299.
- 23 Bishop, D.K., and Hinrichs, D.J. (1987). Adoptive transfer of immunity to *Listeria*  
24 *monocytogenes*. The influence of in vitro stimulation on lymphocyte subset requirements.  
25 *J Immunol* 139, 2005-2009.
- 26 Boilard, E., and Machlus, K.R. (2021). Location is everything when it comes to  
27 megakaryocyte function. *J Clin Invest* 131.
- 28 Bruns, I., Lucas, D., Pinho, S., Ahmed, J., Lambert, M.P., Kunisaki, Y., Scheiermann, C.,  
29 Schiff, L., Poncz, M., Bergman, A., *et al.* (2014). Megakaryocytes regulate hematopoietic  
30 stem cell quiescence through CXCL4 secretion. *Nat Med* 20, 1315-1320.
- 31 Butler, A., Hoffman, P., Smibert, P., Papalexis, E., and Satija, R. (2018). Integrating single-

- 1 cell transcriptomic data across different conditions, technologies, and species. *Nat*  
2 *Biotechnol* *36*, 411-420.
- 3 Campbell, R.A., Schwertz, H., Hottz, E.D., Rowley, J.W., Manne, B.K., Washington,  
4 A.V., Hunter-Mellado, R., Tolley, N.D., Christensen, M., Eustes, A.S., *et al.* (2019).  
5 Human megakaryocytes possess intrinsic antiviral immunity through regulated induction  
6 of IFITM3. *Blood* *133*, 2013-2026.
- 7 Chang, Y., Bluteau, D., Debili, N., and Vainchenker, W. (2007). From hematopoietic stem  
8 cells to platelets. *J Thromb Haemost* *5 Suppl 1*, 318-327.
- 9 Couldwell, G., and Machlus, K.R. (2019). Modulation of megakaryopoiesis and platelet  
10 production during inflammation. *Thromb Res* *179*, 114-120.
- 11 Crow, M., Paul, A., Ballouz, S., Huang, Z.J., and Gillis, J. (2018). Characterizing the  
12 replicability of cell types defined by single cell RNA-sequencing data using  
13 MetaNeighbor. *Nat Commun* *9*, 884.
- 14 Cunin, P., and Nigrovic, P.A. (2019). Megakaryocytes as immune cells. *J Leukocyte Biol*  
15 *105*, 1111-1121.
- 16 Cunin, P., Penke, L.R., Thon, J.N., Monach, P.A., Jones, T., Chang, M.H., Chen, M.M.,  
17 Melki, I., Lacroix, S., Iwakura, Y., *et al.* (2017). Megakaryocytes compensate for Kit  
18 insufficiency in murine arthritis. *J Clin Invest* *127*, 1714-1724.
- 19 Davidson, S., Efremova, M., Riedel, A., Mahata, B., Pramanik, J., Huuhtanen, J., Kar, G.,  
20 Vento-Tormo, R., Hagai, T., Chen, X., *et al.* (2020). Single-Cell RNA Sequencing  
21 Reveals a Dynamic Stromal Niche That Supports Tumor Growth. *Cell Rep* *31*, 107628.
- 22 Davis, R.E., Stenberg, P.E., Levin, J., and Beckstead, J.H. (1997). Localization of  
23 megakaryocytes in normal mice and following administration of platelet antiserum, 5-  
24 fluorouracil, or radiostrontium: evidence for the site of platelet production. *Exp Hematol*  
25 *25*, 638-648.
- 26 Deutsch, V.R., and Tomer, A. (2006). Megakaryocyte development and platelet  
27 production. *Br J Haematol* *134*, 453-466.
- 28 Deutsch, V.R., and Tomer, A. (2013). Advances in megakaryocytopoiesis and  
29 thrombopoiesis: from bench to bedside. *Br J Haematol* *161*, 778-793.
- 30 Dominici, M., Rasini, V., Bussolari, R., Chen, X., Hofmann, T.J., Spano, C., Bernabei,  
31 D., Veronesi, E., Bertoni, F., Paolucci, P., *et al.* (2009). Restoration and reversible  
32 expansion of the osteoblastic hematopoietic stem cell niche after marrow radioablation.  
33 *Blood* *114*, 2333-2343.
- 34 Dong, F., Hao, S., Zhang, S., Zhu, C., Cheng, H., Yang, Z., Hamey, F.K., Wang, X., Gao,  
35 A., Wang, F., *et al.* (2020). Differentiation of transplanted haematopoietic stem cells  
36 tracked by single-cell transcriptomic analysis. *Nat Cell Biol* *22*, 630-639.
- 37 Eash, K.J., Means, J.M., White, D.W., and Link, D.C. (2009). CXCR4 is a key regulator  
38 of neutrophil release from the bone marrow under basal and stress granulopoiesis  
39 conditions. *Blood* *113*, 4711-4719.
- 40 Edelson, B.T., and Unanue, E.R. (2000). Immunity to *Listeria* infection. *Curr Opin*



- 1 Immunol *12*, 425-431.
- 2 Efremova, M., Vento-Tormo, M., Teichmann, S.A., and Vento-Tormo, R. (2020).
- 3 CellPhoneDB: inferring cell-cell communication from combined expression of multi-
- 4 subunit ligand-receptor complexes. *Nat Protoc* *15*, 1484-1506.
- 5 Feng, S., Liu, Y., Liang, W., El-Sayed Ahmed, M.A.E., Zhao, Z., Shen, C., Roberts, A.P.,
- 6 Liang, L., Liao, L., Zhong, Z., *et al.* (2020). Involvement of Transcription Elongation
- 7 Factor GreA in Mycobacterium Viability, Antibiotic Susceptibility, and Intracellular
- 8 Fitness. *Front Microbiol* *11*, 413.
- 9 Finkielstein, A., Schlinker, A.C., Zhang, L., Miller, W.M., and Datta, S.K. (2015).
- 10 Human megakaryocyte progenitors derived from hematopoietic stem cells of normal
- 11 individuals are MHC class II-expressing professional APC that enhance Th17 and
- 12 Th1/Th17 responses. *Immunology Letters* *163*, 84-95.
- 13 Fuentes, R., Wang, Y.H., Hirsch, J., Wang, C., Rauova, L., Worthen, G.S., Kowalska,
- 14 M.A., and Poncz, M. (2010). Infusion of mature megakaryocytes into mice yields
- 15 functional platelets. *Journal of Clinical Investigation* *120*, 3917-3922.
- 16 Göthert, J.R., Gustin, S.E., Hall, M.A., Green, A.R., Göttgens, B., Izon, D.J., and Begley,
- 17 C.G. (2005). In vivo fate-tracing studies using the Scl stem cell enhancer: embryonic
- 18 hematopoietic stem cells significantly contribute to adult hematopoiesis. *Blood* *105*,
- 19 2724-2732.
- 20 Haas, S., Hansson, J., Klimmeck, D., Loeffler, D., Velten, L., Uckelmann, H., Wurzer, S.,
- 21 Prendergast, A.M., Schnell, A., Hexel, K., *et al.* (2015). Inflammation-Induced
- 22 Emergency Megakaryopoiesis Driven by Hematopoietic Stem Cell-like Megakaryocyte
- 23 Progenitors. *Cell Stem Cell* *17*, 422-434.
- 24 Hamada, T., Mohle, R., Hesselgesser, J., Hoxie, J., Nachman, R.L., Moore, M.A., and
- 25 Rafii, S. (1998). Transendothelial migration of megakaryocytes in response to stromal
- 26 cell-derived factor 1 (SDF-1) enhances platelet formation. *J Exp Med* *188*, 539-548.
- 27 Hamey, F.K., Lau, W.W.Y., Kucinski, I., Wang, X., Diamanti, E., Wilson, N.K., Gottgens,
- 28 B., and Dahlin, J.S. (2021). Single-cell molecular profiling provides a high-resolution
- 29 map of basophil and mast cell development. *Allergy* *76*, 1731-1742.
- 30 Hanzelmann, S., Castelo, R., and Guinney, J. (2013). GSVA: gene set variation analysis
- 31 for microarray and RNA-seq data. *BMC Bioinformatics* *14*, 7.
- 32 Hunter, J.D. (2007). Matplotlib: A 2D graphics environment. *Computing in Science &*
- 33 *Engineering* *9*, 90--95.
- 34 Itkin, T., Gur-Cohen, S., Spencer, J.A., Schajnovitz, A., Ramasamy, S.K., Kusumbe, A.P.,
- 35 Ledergor, G., Jung, Y., Milo, I., Poulos, M.G., *et al.* (2016). Distinct bone marrow blood
- 36 vessels differentially regulate haematopoiesis. *Nature* *532*, 323-328.
- 37 Jiang, L., Han, X., Wang, J., Wang, C., Sun, X., Xie, J., Wu, G., Phan, H., Liu, Z., Yeh,
- 38 E.T.H., *et al.* (2018). SHP-1 regulates hematopoietic stem cell quiescence by coordinating
- 39 TGF-beta signaling. *J Exp Med* *215*, 1337-1347.
- 40 Jin, S., Guerrero-Juarez, C.F., Zhang, L., Chang, I., Ramos, R., Kuan, C.H., Myung, P.,

- 1 Plikus, M.V., and Nie, Q. (2021). Inference and analysis of cell-cell communication using  
2 CellChat. *Nat Commun* *12*, 1088.
- 3 Kang, J.B., Nathan, A., Weinand, K., Zhang, F., Millard, N., Rumker, L., Moody, D.B.,  
4 Korsunsky, I., and Raychaudhuri, S. (2021). Efficient and precise single-cell reference  
5 atlas mapping with Symphony. *Nat Commun* *12*, 5890.
- 6 Kiselev, V.Y., Yiu, A., and Hemberg, M. (2018). scmap: projection of single-cell RNA-  
7 seq data across data sets. *Nat Methods* *15*, 359-362.
- 8 Köhler, A., De Filippo, K., Hasenberg, M., van den Brandt, C., Nye, E., Hosking, M.P.,  
9 Lane, T.E., Männ, L., Ransohoff, R.M., Hauser, A.E., *et al.* (2011). G-CSF-mediated  
10 thrombopoietin release triggers neutrophil motility and mobilization from bone marrow  
11 via induction of Cxcr2 ligands. *Blood* *117*, 4349-4357.
- 12 Lefrancais, E., Ortiz-Munoz, G., Caudrillier, A., Mallavia, B., Liu, F., Sayah, D.M.,  
13 Thornton, E.E., Headley, M.B., David, T., Coughlin, S.R., *et al.* (2017). The lung is a site  
14 of platelet biogenesis and a reservoir for haematopoietic progenitors. *Nature* *544*, 105-  
15 109.
- 16 Li, B., Jones, L.L., and Geiger, T.L. (2018). IL-6 Promotes T Cell Proliferation and  
17 Expansion under Inflammatory Conditions in Association with Low-Level ROR $\gamma$ t  
18 Expression. *Journal of immunology (Baltimore, Md : 1950)* *201*, 2934-2946.
- 19 Liu, C., Wu, D., Xia, M., Li, M., Sun, Z., Shen, B., Liu, Y., Jiang, E., Wang, H., Su, P., *et*  
20 *al.* (2021). Characterization of Cellular Heterogeneity and an Immune Subpopulation of  
21 Human Megakaryocytes. *Adv Sci (Weinh)*, e2100921.
- 22 Machlus, K.R., and Italiano, J.E., Jr. (2013). The incredible journey: From  
23 megakaryocyte development to platelet formation. *J Cell Biol* *201*, 785-796.
- 24 Minutti, C.M., Modak, R.V., Macdonald, F., Li, F.Q., Smyth, D.J., Dorward, D.A., Blair,  
25 N., Husovsky, C., Muir, A., Giampazolias, E., *et al.* (2019). A Macrophage-Pericyte Axis  
26 Directs Tissue Restoration via Amphiregulin-Induced Transforming Growth Factor Beta  
27 Activation. *Immunity* *50*, 645-+.
- 28 Nagata, Y., Muro, Y., and Todokoro, K. (1997). Thrombopoietin-induced polyploidization  
29 of bone marrow megakaryocytes is due to a unique regulatory mechanism in late mitosis.  
30 *J Cell Biol* *139*, 449-457.
- 31 Nishimura, S., Nagasaki, M., Kunishima, S., Sawaguchi, A., Sakata, A., Sakaguchi, H.,  
32 Ohmori, T., Manabe, I., Italiano, J.E., Jr., Ryu, T., *et al.* (2015). IL-1 $\alpha$  induces  
33 thrombopoiesis through megakaryocyte rupture in response to acute platelet needs.  
34 *Journal of Cell Biology* *209*, 453-466.
- 35 Olson, T.S., Caselli, A., Otsuru, S., Hofmann, T.J., Williams, R., Paolucci, P., Dominici,  
36 M., and Horwitz, E.M. (2013). Megakaryocytes promote murine osteoblastic HSC niche  
37 expansion and stem cell engraftment after radioablative conditioning. *Blood*.
- 38 Pal, K., Nowak, R., Billington, N., Liu, R., Ghosh, A., Sellers, J.R., and Fowler, V.M.  
39 (2020). Megakaryocyte migration defects due to nonmuscle myosin IIA mutations  
40 underlie thrombocytopenia in MYH9-related disease. *Blood* *135*, 1887-1898.

- 1 Pariser, D.N., Hilt, Z.T., Ture, S.K., Blick-Nitko, S.K., Looney, M.R., Cleary, S.J.,  
2 Roman-Pagan, E., Saunders, J., 2nd, Georas, S.N., Veazey, J., *et al.* (2021). Lung  
3 megakaryocytes are immune modulatory cells. *J Clin Invest* *131*.
- 4 Patel, S.R., Hartwig, J.H., and Italiano, J.E., Jr. (2005). The biogenesis of platelets from  
5 megakaryocyte proplatelets. *The Journal of clinical investigation* *115*, 3348-3354.
- 6 Ren, X., Wen, W., Fan, X., Hou, W., Su, B., Cai, P., Li, J., Liu, Y., Tang, F., Zhang, F., *et*  
7 *al.* (2021). COVID-19 immune features revealed by a large-scale single-cell  
8 transcriptome atlas. *Cell* *184*, 1895-1913 e1819.
- 9 Rothe, G., Kellermann, W., Briegel, J., Schaerer, B., and Valet, G. (1993). Activation of  
10 Neutrophils by Tumor Necrosis Factor- $\alpha$  During Sepsis. In *Host Defense Dysfunction in*  
11 *Trauma, Shock and Sepsis: Mechanisms and Therapeutic Approaches*, E. Faist, J.L.  
12 Meakins, and F.W. Schildberg, eds. (Berlin, Heidelberg: Springer Berlin Heidelberg), pp.  
13 727-735.
- 14 Sacma, M., Pospiech, J., Bogeska, R., de Back, W., Mallm, J.P., Sakk, V., Soller, K.,  
15 Marka, G., Vollmer, A., Karns, R., *et al.* (2019). Haematopoietic stem cells in  
16 perisinusoidal niches are protected from ageing. *Nat Cell Biol* *21*, 1309-1320.
- 17 Shapouri-Moghaddam, A., Mohammadian, S., Vazini, H., Taghadosi, M., Esmacili, S.A.,  
18 Mardani, F., Seifi, B., Mohammadi, A., Afshari, J.T., and Sahebkar, A. (2018).  
19 Macrophage plasticity, polarization, and function in health and disease. *J Cell Physiol*  
20 *233*, 6425-6440.
- 21 Sharif, O., Gawish, R., Warszawska, J.M., Martins, R., Lakovits, K., Hladik, A.,  
22 Doninger, B., Brunner, J., Korosec, A., Schwarzenbacher, R.E., *et al.* (2014). The  
23 triggering receptor expressed on myeloid cells 2 inhibits complement component 1q  
24 effector mechanisms and exerts detrimental effects during pneumococcal pneumonia.  
25 *PLoS Pathog* *10*, e1004167.
- 26 Stephenson, E., Reynolds, G., Botting, R.A., Calero-Nieto, F.J., Morgan, M.D., Tuong,  
27 Z.K., Bach, K., Sungnak, W., Worlock, K.B., Yoshida, M., *et al.* (2021). Single-cell  
28 multi-omics analysis of the immune response in COVID-19. *Nat Med* *27*, 904-916.
- 29 Subramanian, A., Tamayo, P., Mootha, V.K., Mukherjee, S., Ebert, B.L., Gillette, M.A.,  
30 Paulovich, A., Pomeroy, S.L., Golub, T.R., Lander, E.S., *et al.* (2005). Gene set  
31 enrichment analysis: a knowledge-based approach for interpreting genome-wide  
32 expression profiles. *Proc Natl Acad Sci U S A* *102*, 15545-15550.
- 33 Sugiyama, T., Kohara, H., Noda, M., and Nagasawa, T. (2006). Maintenance of the  
34 hematopoietic stem cell pool by CXCL12-CXCR4 chemokine signaling in bone marrow  
35 stromal cell niches. *Immunity* *25*, 977-988.
- 36 Sun, S., Jin, C., Si, J., Lei, Y., Chen, K., Cui, Y., Liu, Z., Liu, J., Zhao, M., Zhang, X., *et*  
37 *al.* (2021). Single-Cell Analysis of Ploidy and Transcriptome Reveals Functional and  
38 Spatial Divergency in Murine Megakaryopoiesis. *Blood*.
- 39 Suraneni, P.K., Corey, S.J., Hession, M.J., Ishaq, R., Awomolo, A., Hasan, S., Shah, C.,  
40 Liu, H., Wickrema, A., Debili, N., *et al.* (2018). Dynamins 2 and 3 control the migration

1 of human megakaryocytes by regulating CXCR4 surface expression and ITGB1 activity.  
2 Blood Adv 2, 3540-3552.

3 Tamura, S., Suzuki-Inoue, K., Tsukiji, N., Shirai, T., Sasaki, T., Osada, M., Satoh, K., and  
4 Ozaki, Y. (2016). Podoplanin-positive periarteriolar stromal cells promote megakaryocyte  
5 growth and proplatelet formation in mice by CLEC-2. Blood 127, 1701-1710.

6 Tiedt, R., Schomber, T., Hao-Shen, H., and Skoda, R.C. (2007). Pf4-Cre transgenic mice  
7 allow the generation of lineage-restricted gene knockouts for studying megakaryocyte  
8 and platelet function in vivo. Blood 109, 1503-1506.

9 Verschoor, A., Neuenhahn, M., Navarini, A.A., Graef, P., Plaumann, A., Seidlmeier, A.,  
10 Nieswandt, B., Massberg, S., Zinkernagel, R.M., Hengartner, H., *et al.* (2011). A platelet-  
11 mediated system for shuttling blood-borne bacteria to CD8 alpha(+) dendritic cells  
12 depends on glycoprotein GPIb and complement C3. Nature Immunology 12, 1194-  
13 U1186.

14 Wang, H., He, J., Xu, C., Chen, X., Yang, H., Shi, S., Liu, C., Zeng, Y., Wu, D., Bai, Z., *et*  
15 *al.* (2021). Decoding Human Megakaryocyte Development. Cell Stem Cell 28, 535-549  
16 e538.

17 Wang, J.F., Liu, Z.Y., and Groopman, J.E. (1998). The alpha-chemokine receptor CXCR4  
18 is expressed on the megakaryocytic lineage from progenitor to platelets and modulates  
19 migration and adhesion. Blood 92, 756-764.

20 Xie, X., Shi, Q., Wu, P., Zhang, X., Kambara, H., Su, J., Yu, H., Park, S.Y., Guo, R., Ren,  
21 Q., *et al.* (2020). Single-cell transcriptome profiling reveals neutrophil heterogeneity in  
22 homeostasis and infection. Nat Immunol 21, 1119-1133.

23 Yamazaki, S., Ema, H., Karlsson, G., Yamaguchi, T., Miyoshi, H., Shioda, S., Taketo,  
24 M.M., Karlsson, S., Iwama, A., and Nakauchi, H. (2011). Nonmyelinating Schwann cells  
25 maintain hematopoietic stem cell hibernation in the bone marrow niche. Cell 147, 1146-  
26 1158.

27 Yeung, A.K., Villacorta-Martin, C., Hon, S., Rock, J.R., and Murphy, G.J. (2020). Lung  
28 megakaryocytes display distinct transcriptional and phenotypic properties. Blood Adv 4,  
29 6204-6217.

30 Yu, G. (2019). enrichplot: Visualization of Functional Enrichment Result.

31 Yu, G., Wang, L.G., Han, Y., and He, Q.Y. (2012). clusterProfiler: an R package for  
32 comparing biological themes among gene clusters. OMICS 16, 284-287.

33 Zhao, M., Perry, J.M., Marshall, H., Venkatraman, A., Qian, P., He, X.C., Ahamed, J., and  
34 Li, L. (2014). Megakaryocytes maintain homeostatic quiescence and promote post-injury  
35 regeneration of hematopoietic stem cells. Nat Med 20, 1321-1326.

36 Zufferey, A., Speck, E.R., Machlus, K.R., Aslam, R., Guo, L., McVey, M.J., Kim, M.,  
37 Kapur, R., Boilard, E., Italiano, J.E., *et al.* (2017). Mature murine megakaryocytes  
38 present antigen-MHC class I molecules to T cells and transfer them to platelets. In Blood  
39 Adv, pp. 1773-1785.

## Figures and figure legends

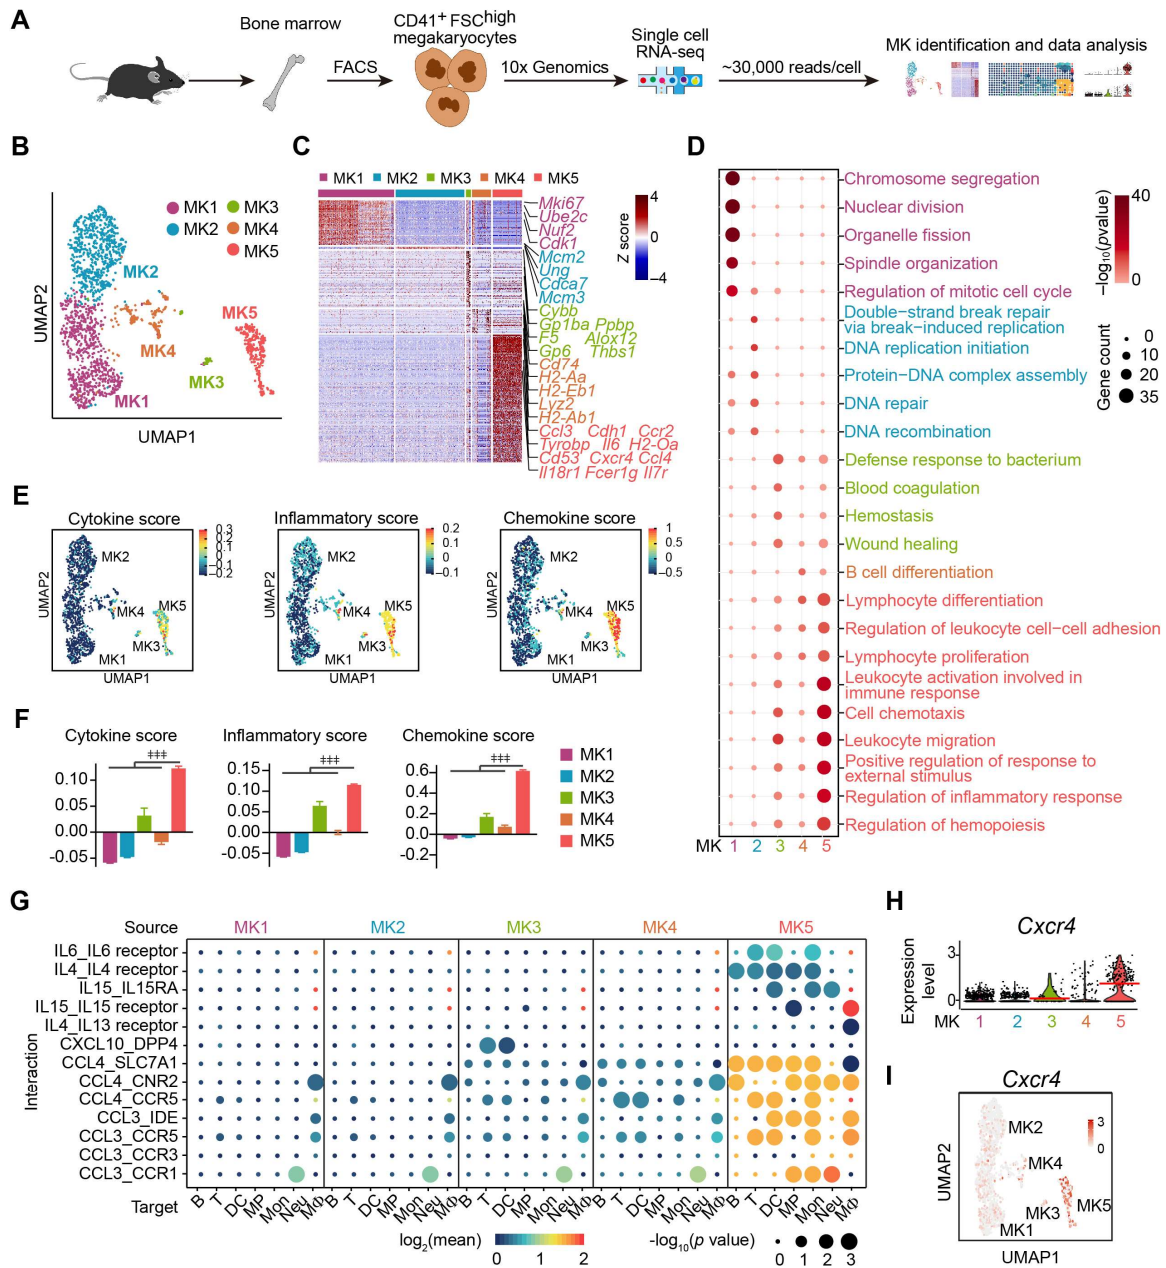

**Figure 1. Single-cell atlas identifies an immune-modulatory subpopulation of MKs**

(A) Schematic strategy for MK preparation, scRNA-seq and data analysis. (B) Clustering of 1 712 bone marrow MKs. (C) Heatmap of signature gene expression in MK subpopulations (fold-change > 1.5,  $p$  value < 0.05) with exemplar genes listed on the right

(top, color-coded by subpopulations). Columns denote cells; rows denote genes. Z score, row-scaled expression of the signature genes in each subpopulation. **(D)** Gene Ontology (GO) analysis of signature genes (fold-change > 1.5,  $p$  value < 0.05) for each MK subpopulations. GO terms selected with Benjamini–Hochberg-corrected  $p$  values < 0.05 and colored by  $-\log_{10}(p$  value). Bubble size indicates the enriched gene number of each term. **(E-F)** UMAP visualization **(E)** and statistical analysis **(F)** of cytokine score (left), inflammatory score (middle) and chemokine score (right) in MK1 to 5. **(G)** Dotplots of significant cytokine ligand (source) -receptor (target) interactions between MKs and immune cells discovered. The color indicates the means of the receptor-ligand pairs between two cell types and bubble size indicates  $p$  values. Mon, monocytes; M $\Phi$ , macrophages (Dong et al., 2020); DC, dendritic cells; Neu, neutrophils; MP, myeloid progenitors; T, T cells; B, B cells. **(H-I)** Violin plot **(H)** and feature plot **(I)** of selected signature genes of MK5. Red lines in **(H)** indicate the median gene expression. Repeated-measures one-way ANOVA followed by Dunnett’s test for multiple comparisons in **(F)**, #  $p$  < 0.01, ##  $p$  < 0.001.

The following figure supplements are available for figure 1:

Figure 1-figure supplement 1. Cell isolation, quality control and annotation of scRNA-seq data.

Figure 1-figure supplement 2. Cell type identification by alignment with published scRNA-seq data.

Figure 1-figure supplement 3. Identification of MK subpopulations.

Figure 1-figure supplement 4. Enriched genes in MK1 to 4 and MK5.

Figure 1-figure supplement 5. MK5 interacts with immune cells and express signature

genes of immune MKs.

Figure 1-figure supplement 6. Polyploidy, platelet generation ability and cell size of

CXCR4<sup>low</sup> and CXCR4<sup>high</sup> MKs.

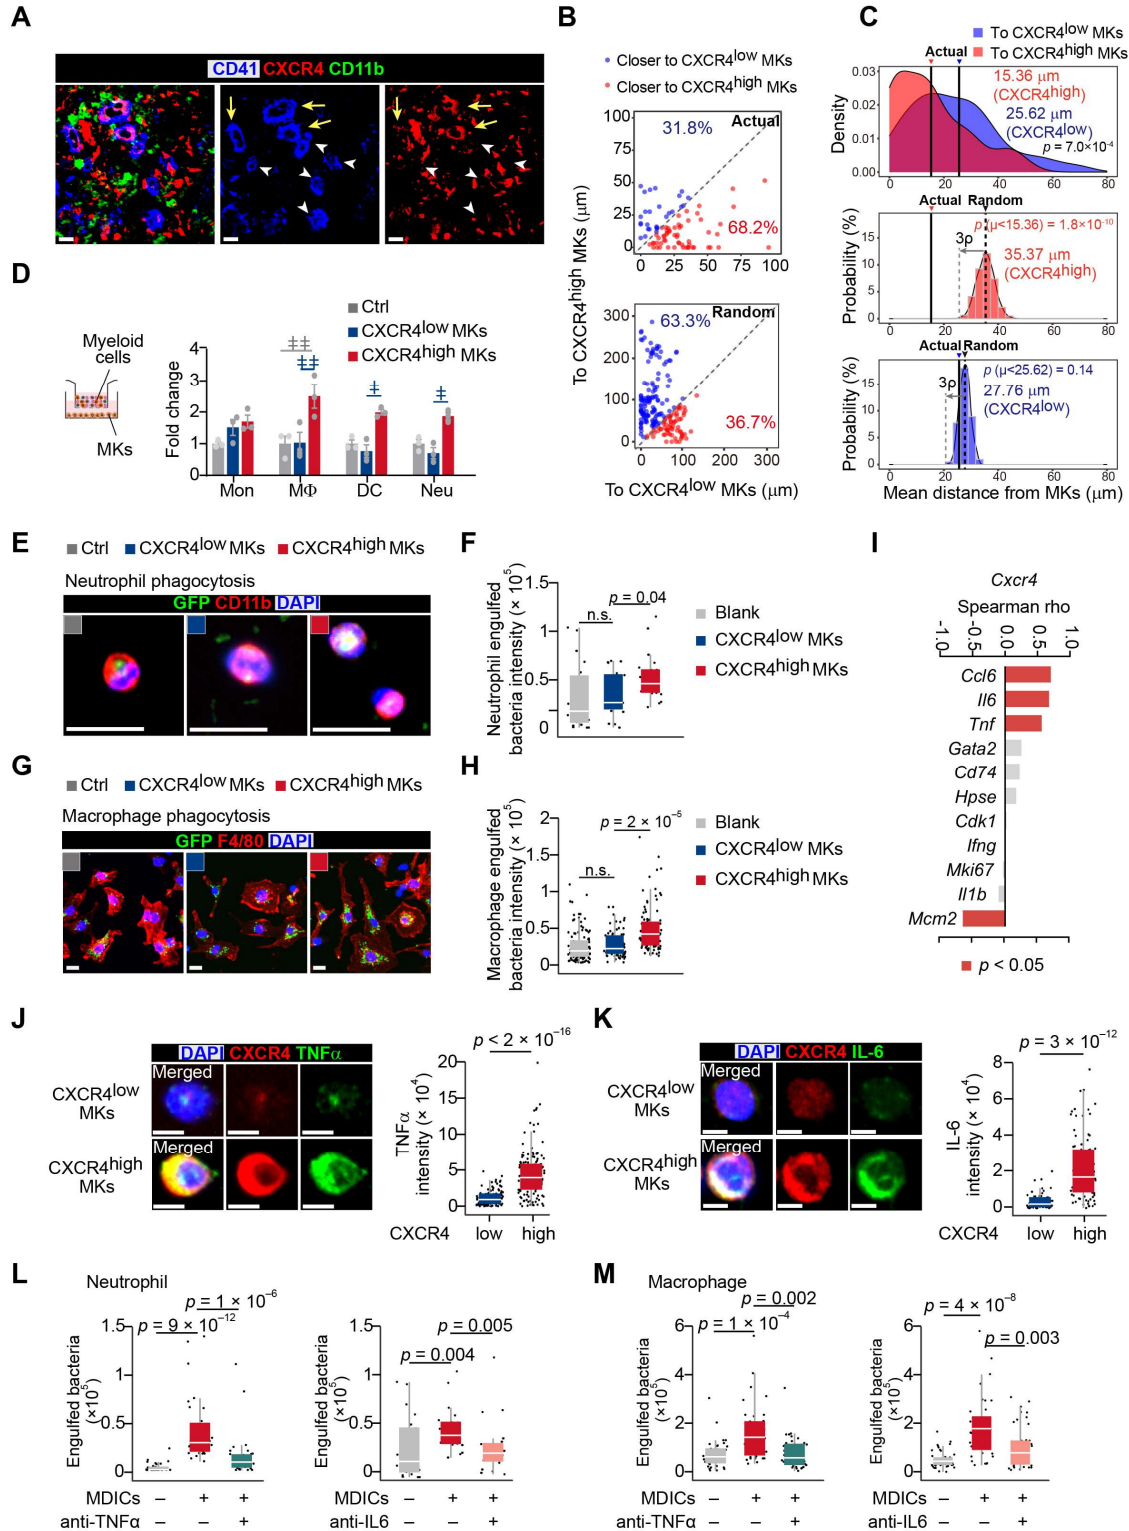

**Figure 2. MDICs enhance myeloid cell mobility and bacterial phagocytosis**



(A) Distribution of myeloid cells to CXCR4<sup>low</sup> or CXCR4<sup>high</sup> MKs three days after *L. monocytogenes* infection. Representative images of MKs (blue), CXCR4 (red), and myeloid cells (green) in mouse bone marrow. Yellow arrows indicate CXCR4<sup>high</sup> MKs and white arrowheads indicate CXCR4<sup>low</sup> MKs. (B-C) Distance (B) and mean distance (C) of actual or randomly positioned myeloid cells to the closest CXCR4<sup>low</sup> and CXCR4<sup>high</sup> MKs. (D) Numbers of transmigrated myeloid cells normalized to Ctrl (without MKs in the lower chambers) as indicated by transwell assays. Mon, monocytes; MΦ, macrophages; DC, dendritic cells; Neu, neutrophils. (E-F) Representative images (E) and quantification (F) of neutrophil phagocytosis capacity with or without MK co-culture as indicated. CD11b, red; *E. coli*, green; DAPI, blue. Blank, neutrophil without MK co-culture (Blank,  $n = 20$ ; CXCR4<sup>low</sup> MKs,  $n = 19$ ; CXCR4<sup>high</sup> MKs,  $n = 20$ ). (G-H) Representative images (G) and quantification (H) of macrophage phagocytosis capacity with or without MK co-culture as indicated. F4/80, red; *E. coli*, green; DAPI, blue. Blank, macrophage without MK co-culture (Blank,  $n = 110$ ; CXCR4<sup>low</sup> MKs,  $n = 69$ ; CXCR4<sup>high</sup> MKs,  $n = 94$ ). (I) Spearman correlation analysis between expression profiles of *Cxcr4* and feature genes in MK subpopulations. (J-K) TNFα (J) and IL-6 (K) protein levels in purified CXCR4<sup>low</sup> MKs and CXCR4<sup>high</sup> MKs by immunostaining. (L-M) Quantification of neutrophil (L) and macrophage (M) phagocytosis with or without CXCR4<sup>high</sup> MK co-culture in the absence or presence of anti-TNFα or anti-IL-6 neutralizing antibodies. Scale bars, 20 μm (A, E, G) or 5 μm (J, K). Data represent mean ± s.e.m (D) and means ± first and third quartiles (F, H, J-M). Repeated-measures one-way ANOVA followed by Dunnett's test for multiple comparisons in (D), †  $p < 0.05$ , #  $p < 0.01$ . A two-sample KS test was performed to assess statistically significant (C, F, H, J-M), n.s., not significant.

The following figure supplements are available for figure 2:

Figure 2-figure supplement 1. L. monocytogenes promote myelopoiesis and the association of myeloid cells and the CXCR4<sup>high</sup> MK-blood vessel intersection.

Figure 2-figure supplement 2. TNF $\alpha$  and IL-6 expression in CXCR4<sup>low</sup> and CXCR4<sup>high</sup> MKs.

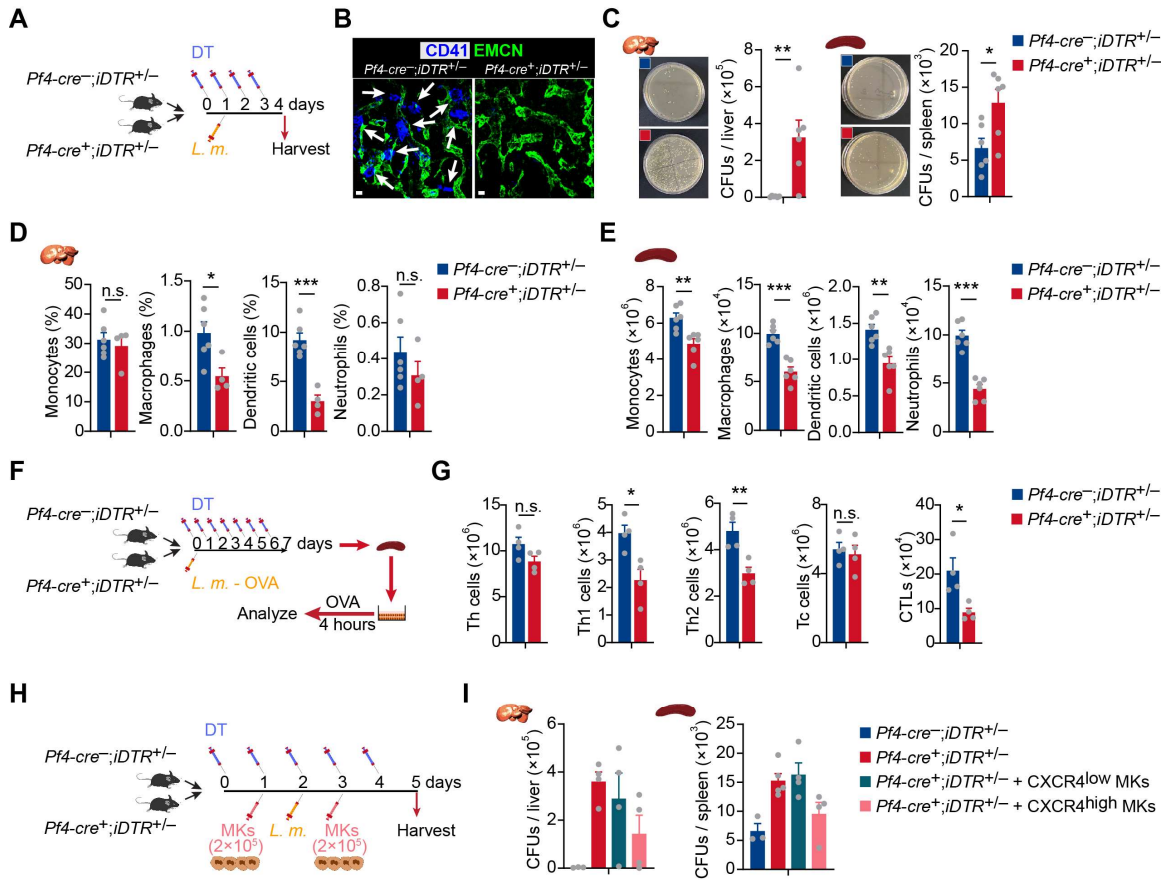

**Figure 3. MKs stimulate both innate and adaptive immunity against bacterial pathogens**

(A) Schema for diphtheria toxin (DT) and *L. monocytogenes* administration used for the experiments shown in (B-E). (B) Representative images of MKs (blue, indicated by arrows) and vascular endothelial cells (green) in the bone marrow of mice after four daily DT treatments. (C) Bacterial burdens in the liver and spleen of *Pf4-cre<sup>-/-</sup>;iDTR<sup>+/-</sup>* mice three days after *L. monocytogenes* (*L.m.*) infection with four-time DT injections. (D-E) Myeloid cells in the liver (D) and spleen (E) of *Pf4-cre<sup>-/-</sup>;iDTR<sup>+/-</sup>* mice three days after *L. monocytogenes* (*L.m.*) infection with four-time DT injections. (F) Schema for antigen-specific T cell activation assay shown in (G). (G) Splenocytes from control or MK ablated mice seven

days after *L. monocytogenes*-OVA<sub>257-264</sub> infection and seven DT injections were stimulated with OVA peptide *in vitro* for 4 hours, and antigen-specific activated T cells were quantified ( $n = 4$  mice). *L.m.*-OVA, *L. monocytogenes*-OVA<sub>257-264</sub>. (H) Schema for DT, *L. monocytogenes* administration, MK transfusing and bacterial burden determination shown in (I). (G) Bacterial burdens in the liver and spleen of *Pf4-cre; iDTR* mice without or with CXCR4<sup>low</sup> or CXCR4<sup>high</sup> MK transfused. Data represent mean  $\pm$  s.e.m. Two-tailed Student's *t*-test was performed to assess statistical significance, \*  $p < 0.05$ , \*\*  $p < 0.01$ , \*\*\*  $p < 0.001$ , n.s., not significant.

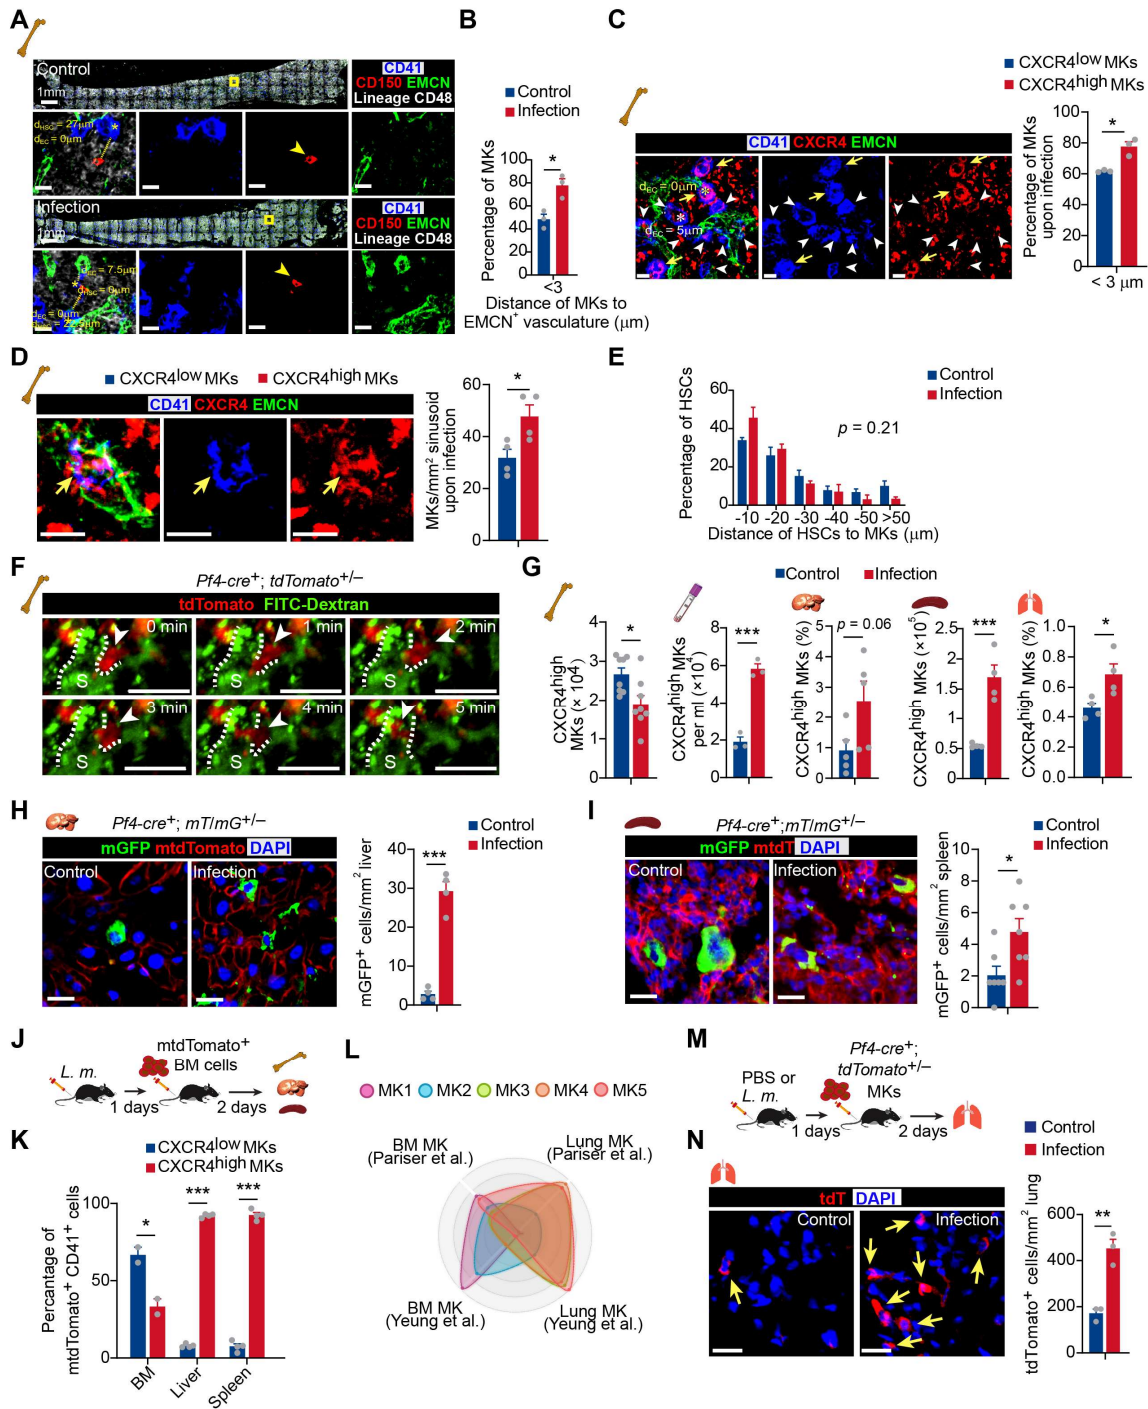

**Figure 4. Bacterial infection stimulates MDIC migration**

(A) Representative image of CD41 (blue), CD150 (red), EMCN (green) and lineage cells (white) in bone marrow from control mice or mice at three days after *L. monocytogenes*

infection.  $d_{HSC}$  and  $d_{EC}$  indicate the distance between the MK (blue, marked with an asterisk) and the closest HSC (red), endothelial cell (green), respectively. Yellow boxes indicate the locations of the magnified images. Arrowheads indicate HSCs. EMCN, endomucin; EC, endothelial cell. **(B)** Comparison of the distance between MKs to ECs ( $n = 119$  control and 103 infected MKs) in the bone marrow of control mice or mice at three days after *L. monocytogenes* infection. **(C)** Comparison of the distance between CXCR4<sup>low</sup> or CXCR4<sup>high</sup> MKs and endothelial cells (ECs) in the bone marrow of mice three days after *L. monocytogenes* infection ( $n = 68$  CXCR4<sup>low</sup> and 78 CXCR4<sup>high</sup> MKs). CD41 (blue), CXCR4 (red) and EMCN (green). Yellow arrows indicate CXCR4<sup>high</sup> MKs, while white arrowheads indicate CXCR4<sup>low</sup> MKs. **(D)** Representative immunofluorescent staining images (left) and quantification (right) of CXCR4 (red) labeled MKs (blue) egressed into sinusoids (green) upon infection ( $n = 46$  CXCR4<sup>low</sup> MKs and 69 CXCR4<sup>high</sup> MKs in four biological replicates). Yellow arrows indicate CXCR4<sup>high</sup> MKs. **(E)** Comparison of the distance between HSCs to MKs ( $n = 96$  control and 127 infected HSCs,  $p = 0.21$  by two-sample KS test) in the bone marrow of control mice or mice at three days after *L. monocytogenes* infection. **(F)** Visualization of MK migration (red, arrowhead) into sinusoids (green) by live imaging in the bone marrow of *Pf4-cre*<sup>+</sup>; *tdTomato*<sup>+/-</sup> mice 24 hours after *L. monocytogenes* infection (Movie S1). “S” indicates sinusoid and dashed lines demarcate the border of sinusoids. **(G)** Quantification of CXCR4<sup>high</sup> MKs in bone marrow, peripheral blood, liver, spleen, and lung of control mice and mice three days after *L. monocytogenes* infection. **(H-I)** Representative images and quantification of mGFP<sup>+</sup> cells (green) in the liver **(H)** and spleen **(I)** from control mice or mice three days after *L. monocytogenes* infection ( $n = 4$  and 7 mice, respectively). **(J)** Schema of *mtdTomato*<sup>+</sup> bone

marrow (from  $R26R^{mT/mG}$  mice) cell perfusion in control and *L. monocytogenes* infected recipients. **(K)** The percentage of  $CXCR4^{\text{high}}$  mtdTomato<sup>+</sup> MKs and  $CXCR4^{\text{low}}$  mtdTomato<sup>+</sup> MKs in bone marrow, liver and spleen of control or infected recipients were analyzed two days after mtdTomato<sup>+</sup> bone marrow cells were perfused. **(L)** Radar chart showing transcriptomic similarities of bone marrow MK subpopulations with reported BM and lung MK datasets (Pariser et al., 2021; Yeung et al., 2020). **(M)** Schema for transfer experiments using tdTomato<sup>+</sup> MKs from *Pf4-cre*<sup>+</sup>; *tdTomato*<sup>+/-</sup> mice into control recipients or recipients one day following *L. monocytogenes* infection. **(N)** Representative images (left) and quantification (right) of tdTomato<sup>+</sup> MKs in the lung of control or infected recipients two days after cell perfusion ( $n = 3$  mice). Arrows indicate tdTomato<sup>+</sup> MKs in the lung. Scale bars without indicated, 20  $\mu\text{m}$ . A two-sample KS test was performed to assess statistical significance in **(E)**. Two-tailed Student's *t*-test was performed to assess statistical significance except **(E)**, \*  $p < 0.05$ , \*\*  $p < 0.01$ , \*\*\*  $p < 0.001$ , n.s., not significant.

The following figure supplements are available for figure 4:

Figure 4-figure supplement 1. The effects of association of MKs and blood vessels, HSC activation, and MK numbers in bone marrow upon bacterial infection.

Figure 4-figure supplement 2. scRNA-seq of MKs from mice upon bacterial infection.

Figure 4-figure supplement 3. *Cxcl12* expression upon bacterial infection.

Figure 4-figure supplement 4. Cell cycle and apoptosis of  $CXCR4^{\text{high}}$  MKs, and  $CXCR4^{\text{low}}$  MK numbers in different organs upon bacterial infection.

Figure 4-figure supplement 5. Immune gene expression in bone marrow and lung MKs.

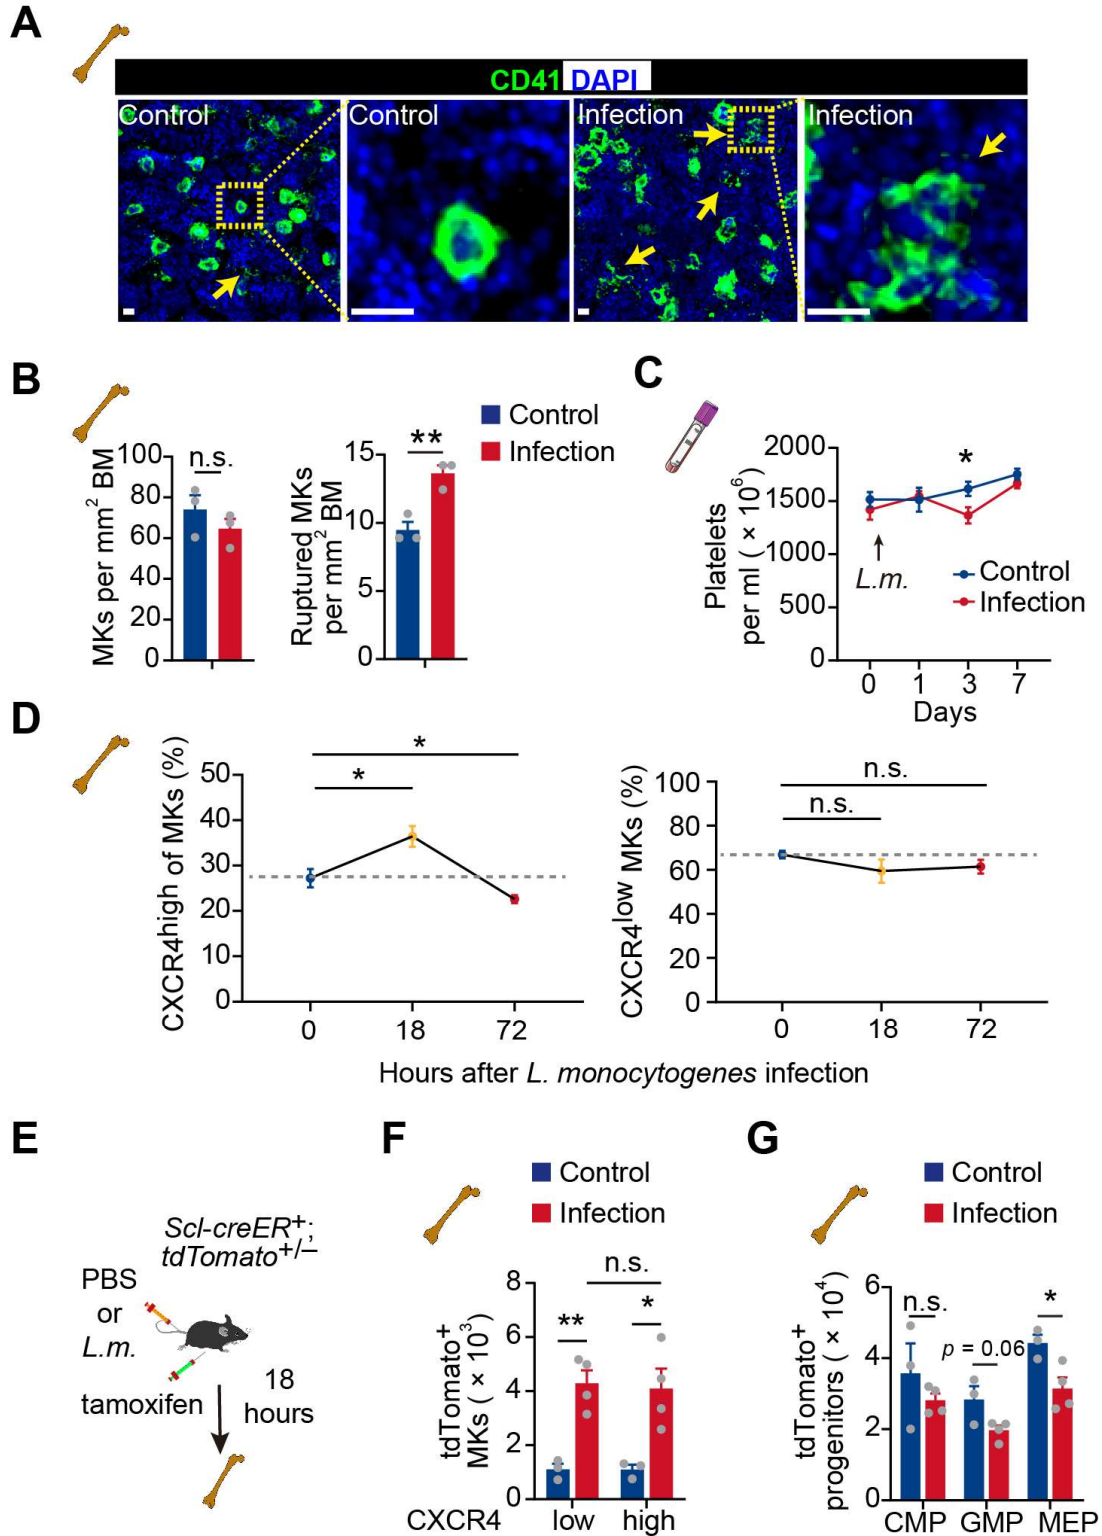

**Figure 5. Acute inflammation induces emergency megakaryopoiesis of MDICs**



**(A-B)** Representative images **(A)** and statistical analysis **(B)** of CD41 (green) and DAPI (blue) in bone marrow from control mice or mice three days after *L. monocytogenes* infection. Arrows indicate ruptured MKs, yellow boxes indicate the locations of the magnified images. **(C)** Platelets in peripheral blood in control mice or mice after *L. monocytogenes* infection on indicated days. **(D)** The dynamics percentage of CXCR4<sup>high</sup> MKs (left) or CXCR4<sup>low</sup> MKs (right) in the bone marrow of *L. monocytogenes*-challenged mice within 72 hours of infection. **(E)** Schema for HSC lineage tracing upon *L. monocytogenes* infection using *Scl-creER*<sup>+</sup>; *tdTomato*<sup>+/-</sup> mice. **(F-G)** Cell numbers of tdTomato<sup>+</sup> CXCR4<sup>low</sup> MKs and tdTomato<sup>+</sup> CXCR4<sup>high</sup> MKs **(F)**, and tdTomato<sup>+</sup> progenitors **(G)** in the bone marrow of control and *L. monocytogenes* infected *Scl-creER*<sup>+</sup>; *tdTomato*<sup>+/-</sup> recipients 18 hours after *L. monocytogenes* infection and tamoxifen administration. CMP, common myeloid progenitor; GMP, granulocyte-monocyte progenitor; MEP, megakaryocyte-erythroid progenitor. Scale bars, 20  $\mu$ m. Data represent mean  $\pm$  s.e.m. Two-tailed Student's *t*-test was performed to assess statistical significance, \*  $p < 0.05$ , \*\*  $p < 0.01$ , n.s., not significant.
